# Supplementary material for: Solvent-free implementation of two dissimilar reactions using recyclable CuO nanoparticles under ball-milling conditions: synthesis of new oxindole-triazole pharmacophores
Source: Royal Society of Chemistry journal article supplement (doi:10.1039/c7gc01284e), 2017-01-01
Supplement: c7gc01284e1.pdf [file c7gc01284e1.pdf]

## Electronic Supporting Information

### Solvent-free implementation of two dissimilar reactions using recyclable CuO nanoparticle under ball-milling conditions: Green synthesis of new oxindole-triazole pharmacophores

M. Vadivelu,<sup>a</sup> S. Sugirdha,<sup>a</sup> P. Dheenkumar,<sup>b</sup> Y. Arun,<sup>c</sup> K. Karthikeyan,<sup>\*a</sup> and C. Praveen<sup>\*d</sup>

<sup>a</sup>Department of Chemistry, B. S. Abdur Rahman Crescent University, Vandalur, Chennai-600048, Tamil Nadu, India.

<sup>b</sup>Siddhartha Institute of Pharmaceutical Sciences, Narasaraopet, Jonnalagadda-522601, Andhra Pradesh, India

<sup>c</sup>Organic and Bioorganic Chemistry Division, CSIR-Central Leather Research Institute, Adyar, Chennai-600020, Tamil Nadu, India

<sup>d</sup>Functional Materials Division, CSIR-Central Electrochemical Research Institute, Karaikudi-630003, Tamil Nadu, India.

\*Email: [karthiclri@gmail.com](mailto:karthiclri@gmail.com); [chandrasekar.praveen@gmail.com](mailto:chandrasekar.praveen@gmail.com)

### Contents

|                                                              |         |
|--------------------------------------------------------------|---------|
| <sup>1</sup> H NMR and <sup>13</sup> C of all compounds      | S2-S17  |
| HRMS of all compounds                                        | S18-S25 |
| Crystal parameters of compound <b>4e</b>                     | S26     |
| HPLC chart of racemic <b>4a</b> and enantioexcess <b>4a'</b> | S27-28  |
| Molecular docking pose of all compounds                      | S29-37  |

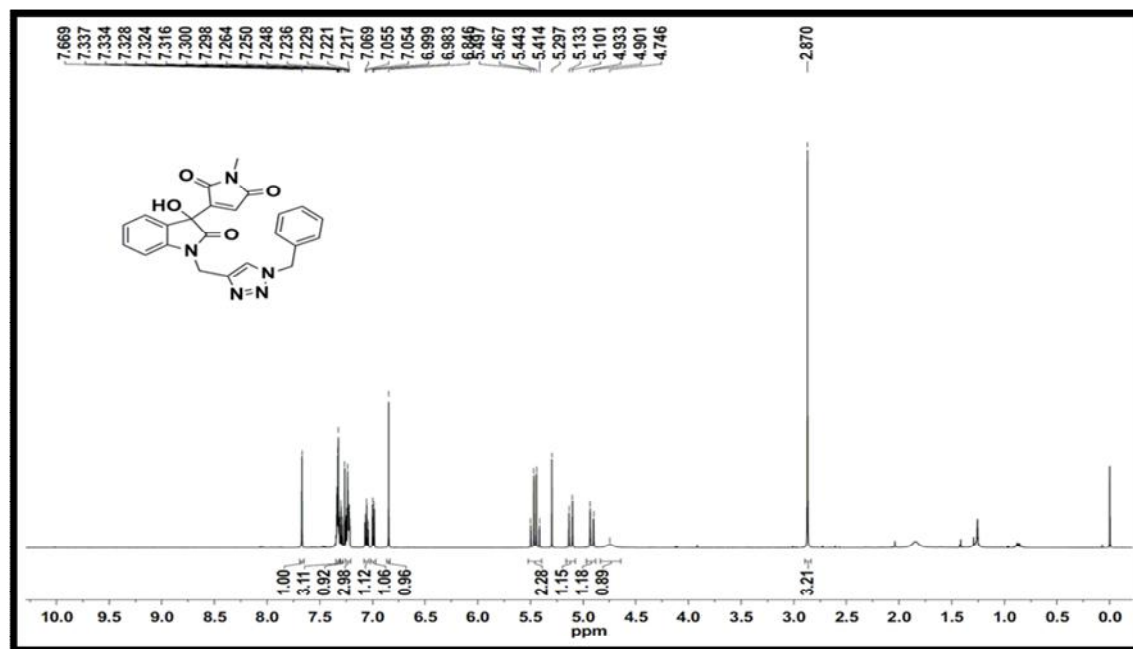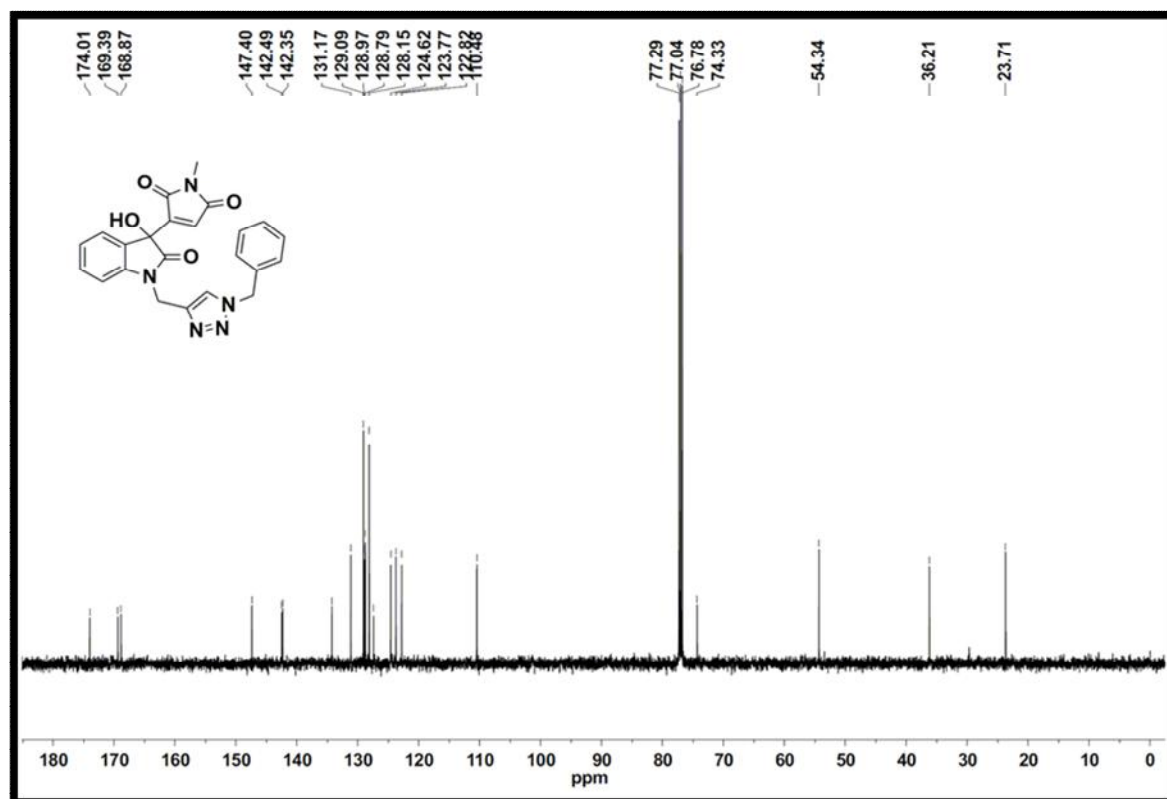

**<sup>1</sup>H and <sup>13</sup>C NMR Spectrum of Compound 4a (500 MHz, CDCl<sub>3</sub>)**

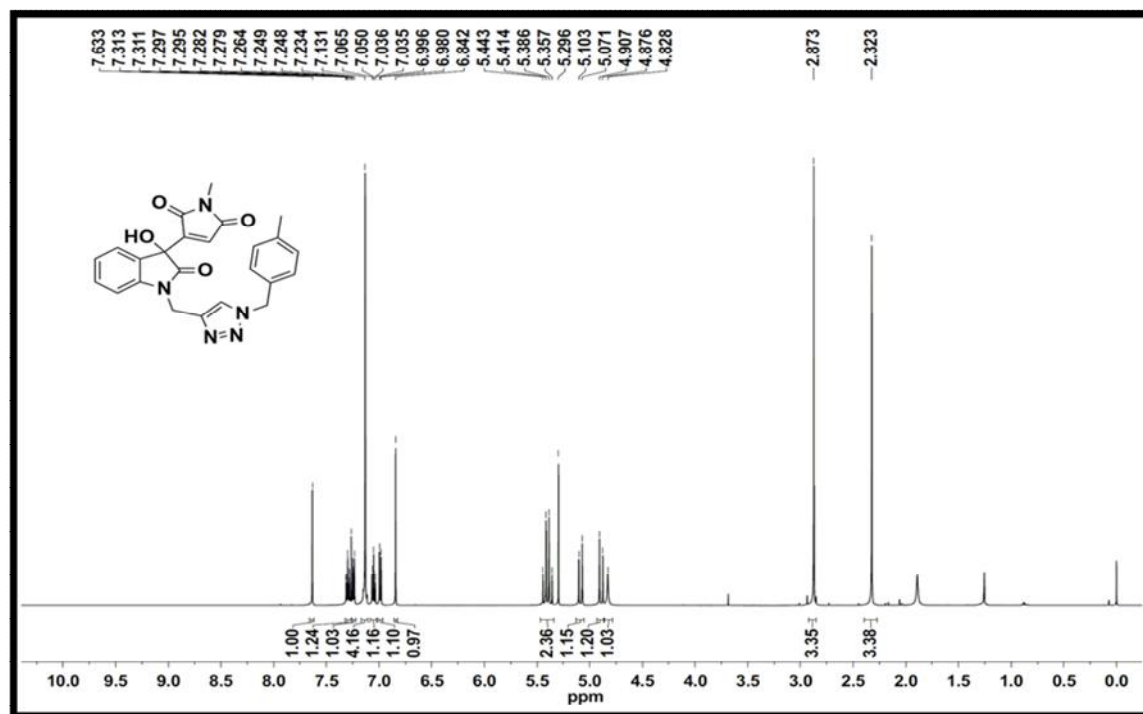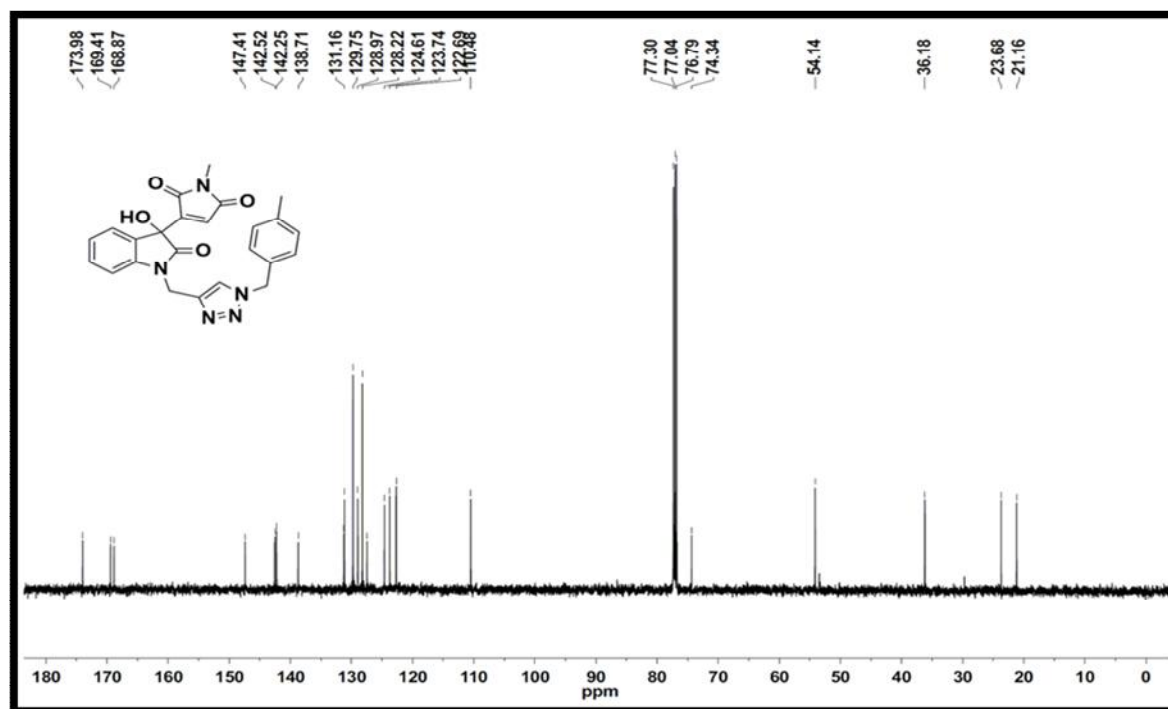

**<sup>1</sup>H and <sup>13</sup>C NMR Spectrum of Compound 4b (500 MHz, CDCl<sub>3</sub>)**

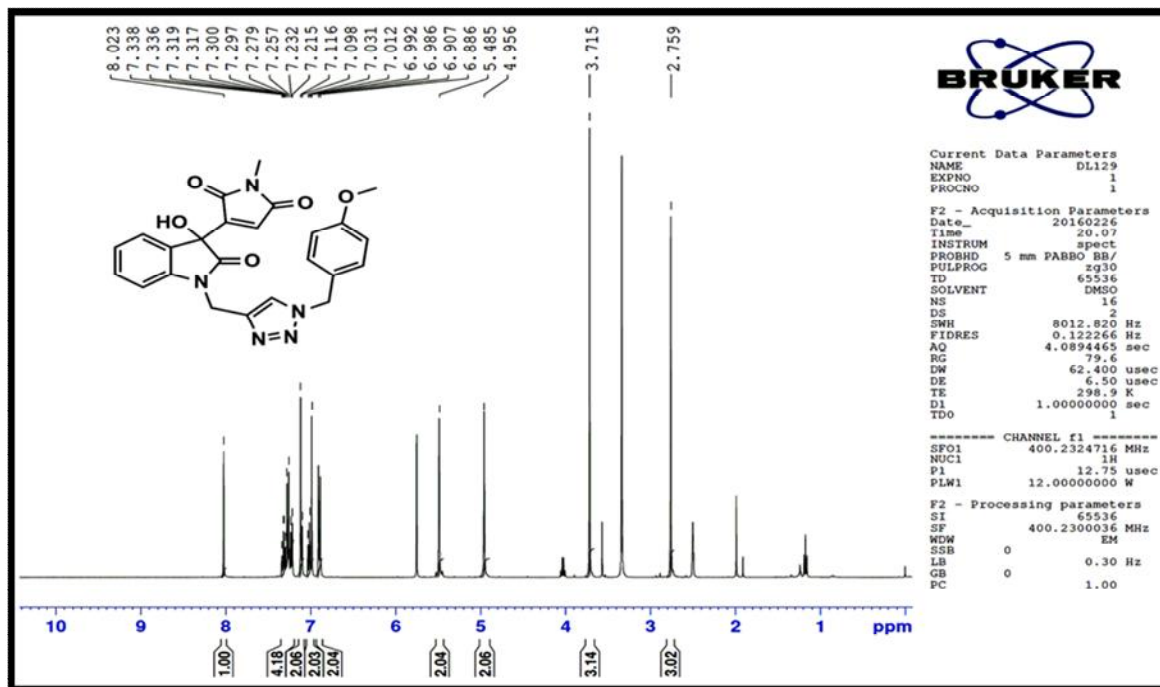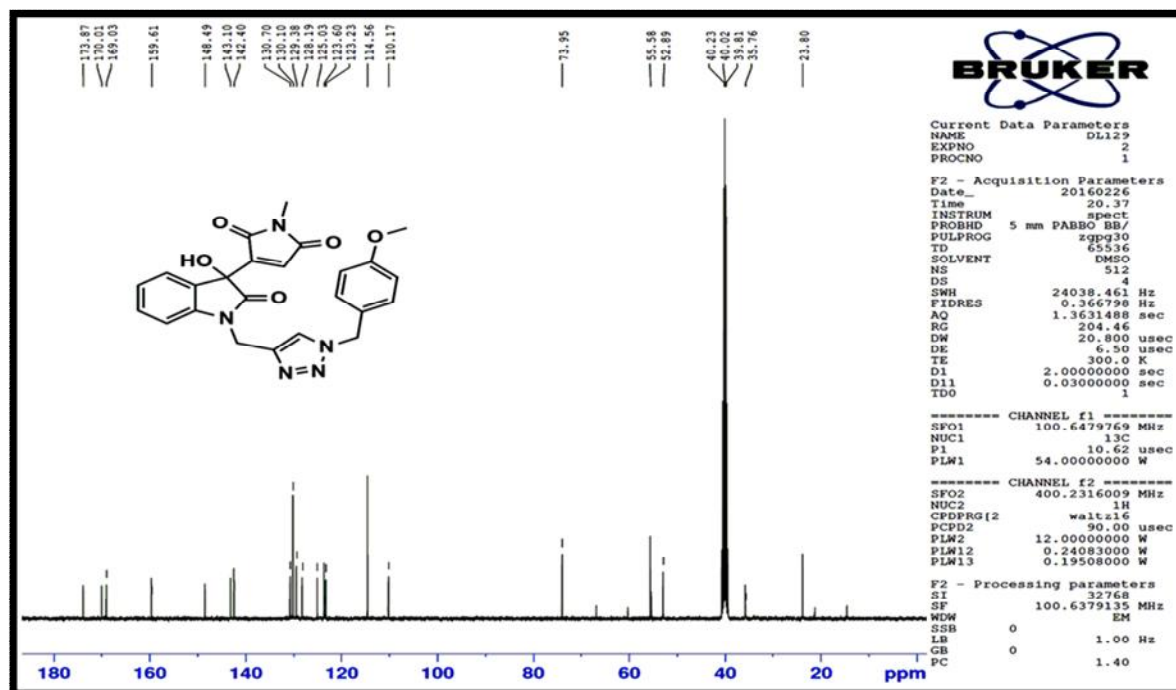

**<sup>1</sup>H and <sup>13</sup>C NMR Spectrum of Compound 4c (400 MHz, DMSO-d<sub>6</sub>)**

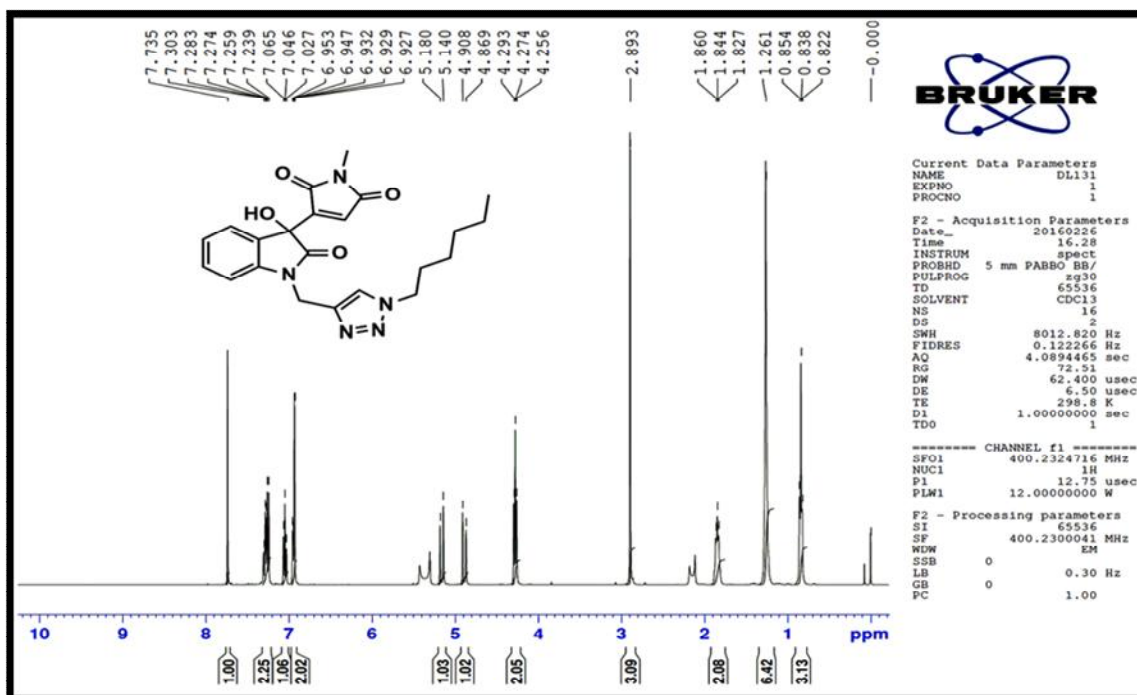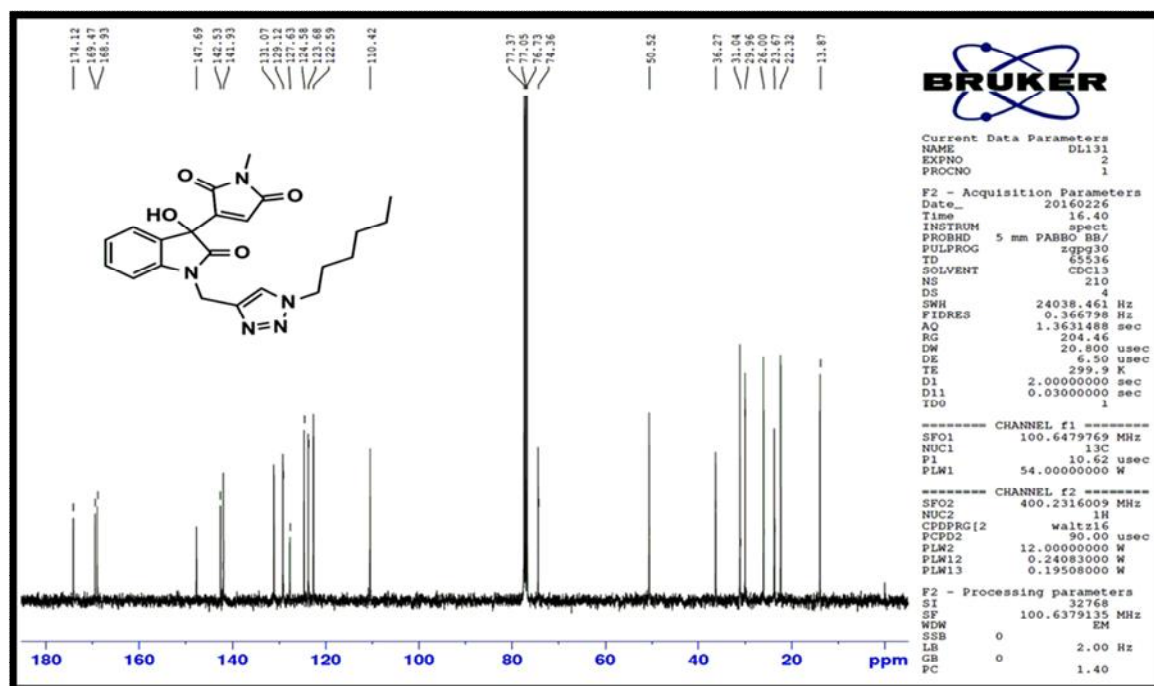

**<sup>1</sup>H and <sup>13</sup>C NMR Spectrum of Compound 4d (400 MHz, CDCl<sub>3</sub>)**



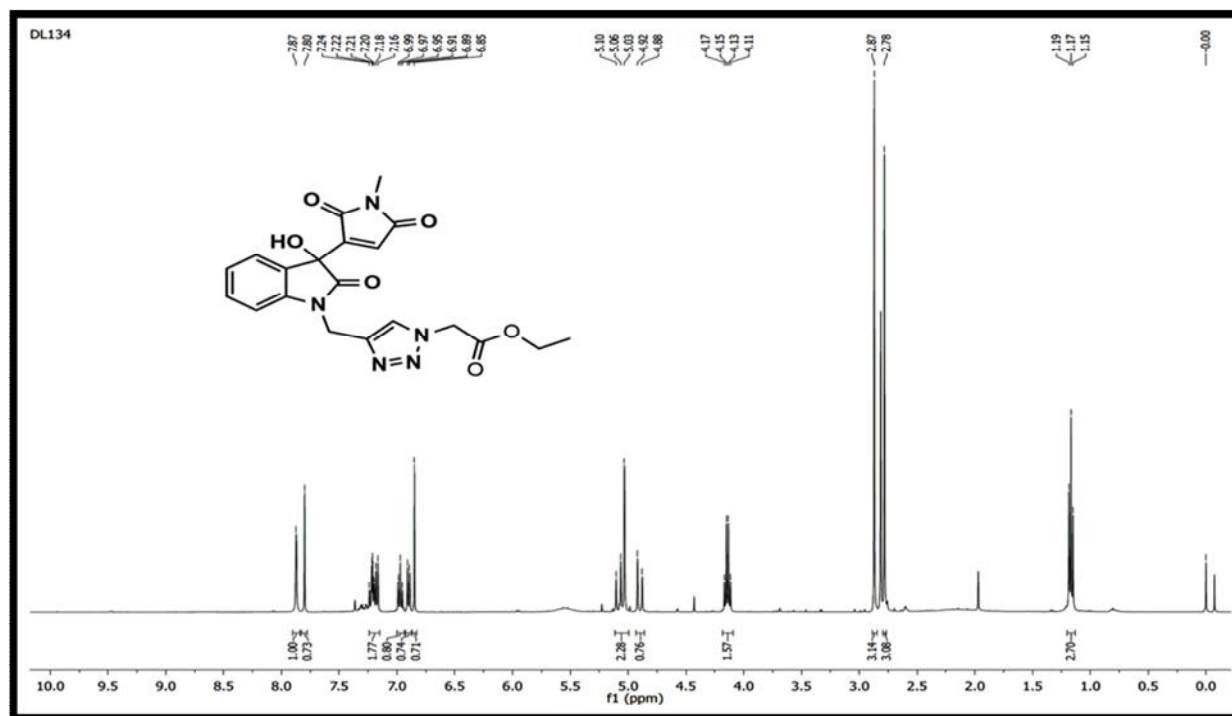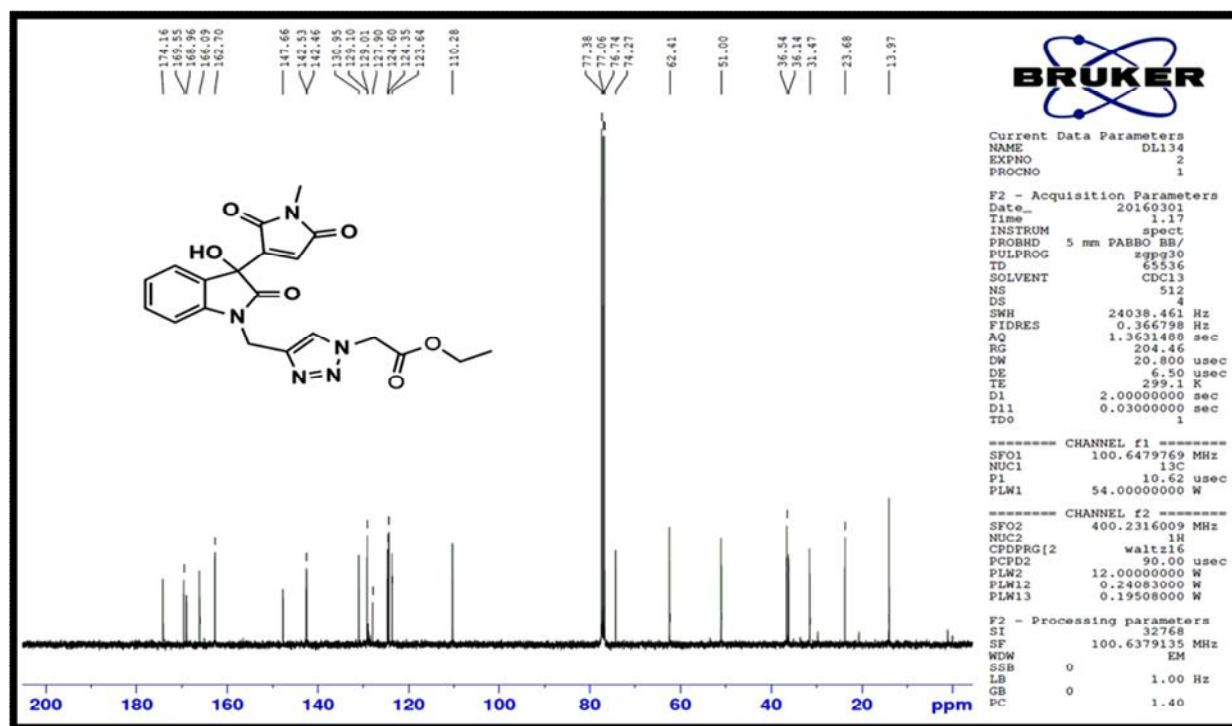

$^1\text{H}$  and  $^{13}\text{C}$  NMR Spectrum of Compound 4f (400 MHz,  $\text{CDCl}_3$ )



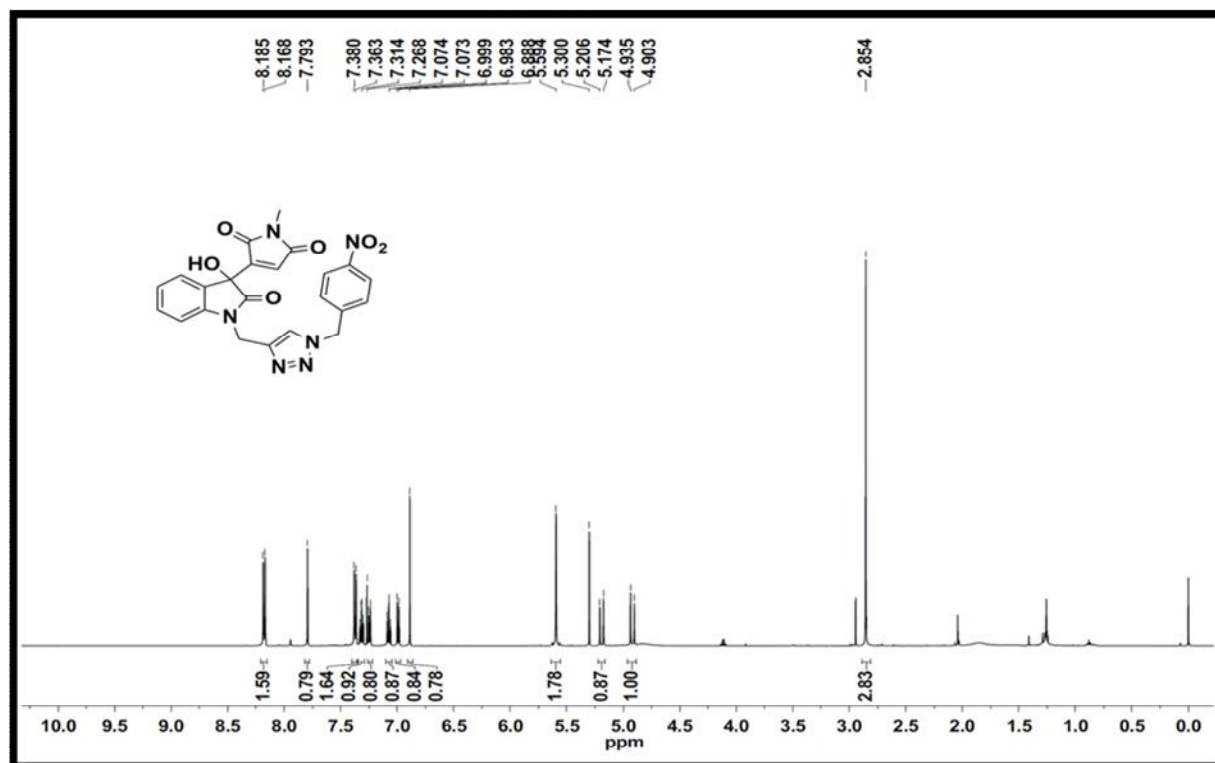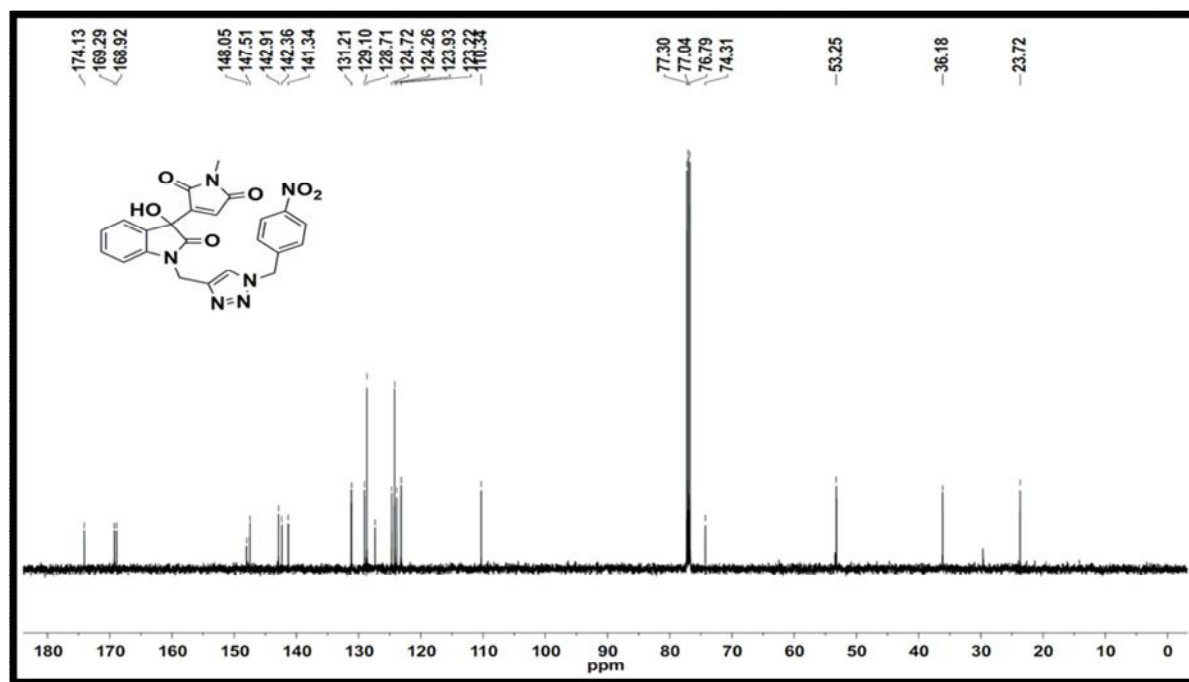

**<sup>1</sup>H and <sup>13</sup>C NMR Spectrum of Compound 4g (500 MHz, CDCl<sub>3</sub>)**



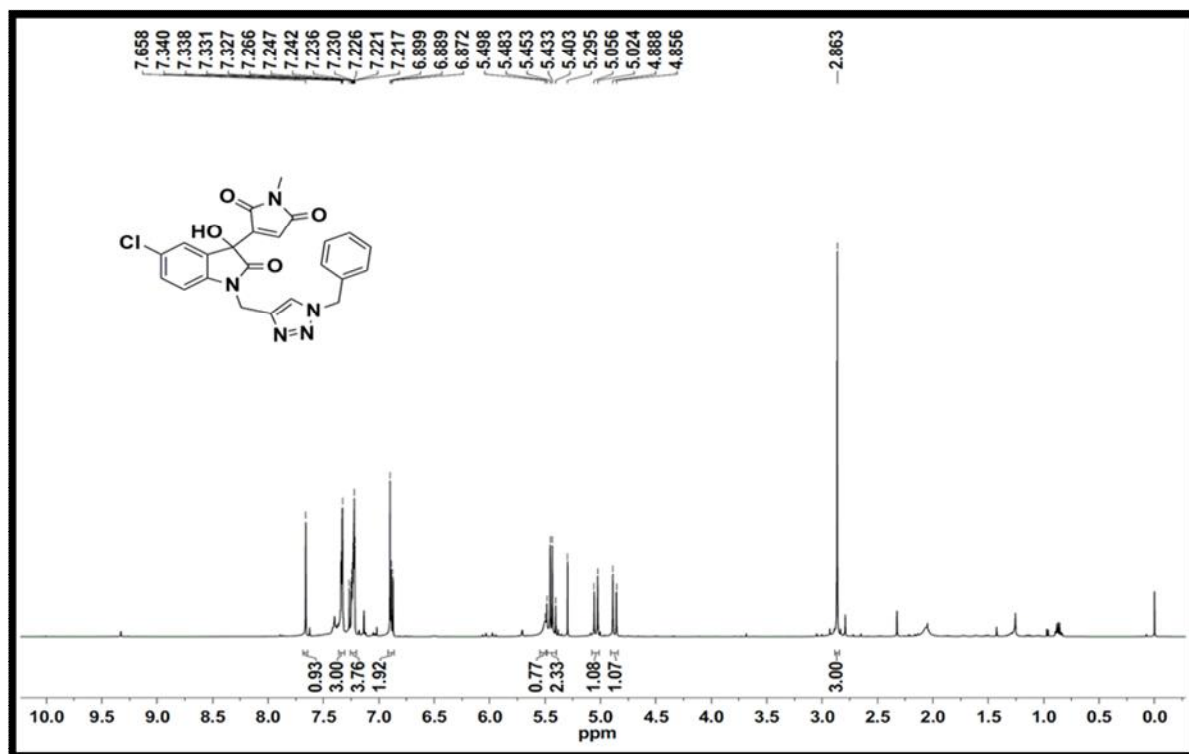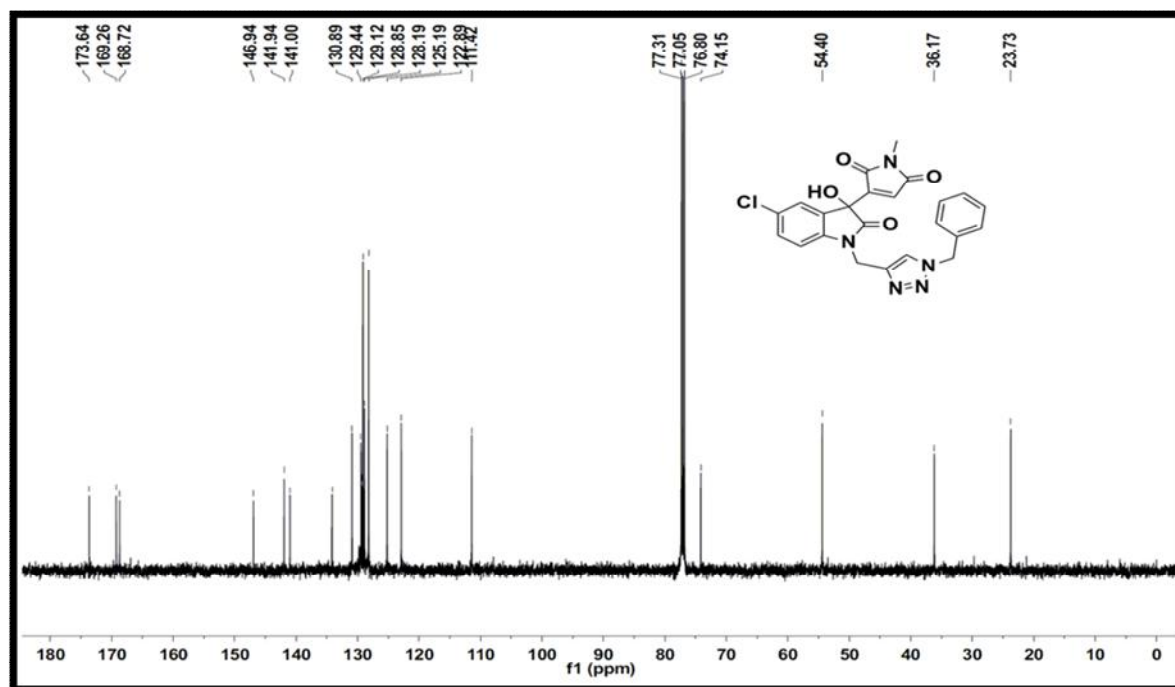

**<sup>1</sup>H and <sup>13</sup>C NMR Spectrum of Compound 4h (500 MHz, CDCl<sub>3</sub>)**

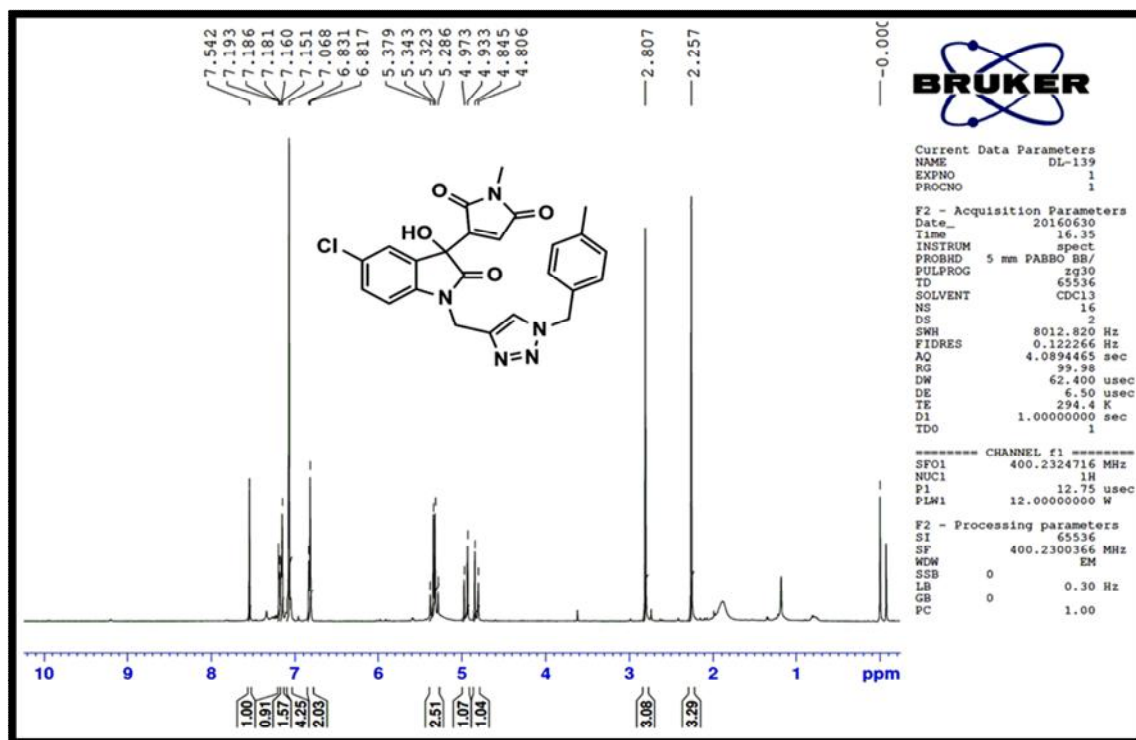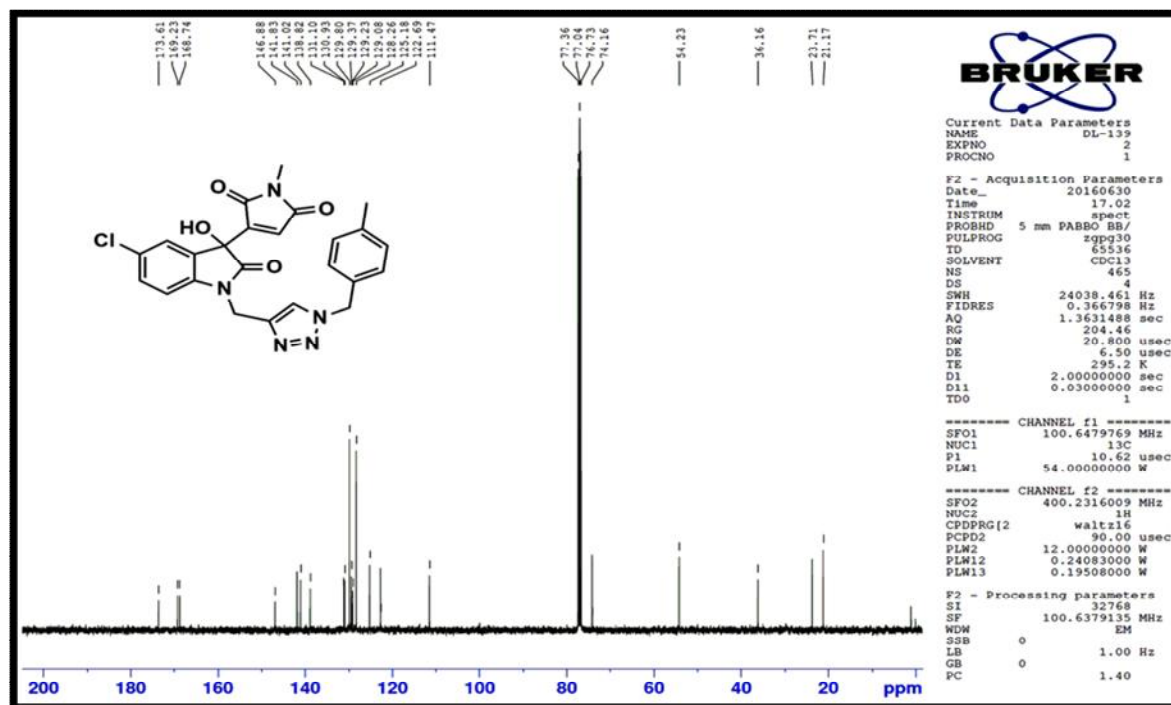

**<sup>1</sup>H and <sup>13</sup>C NMR Spectrum of Compound 4i (400 MHz, CDCl<sub>3</sub>)**

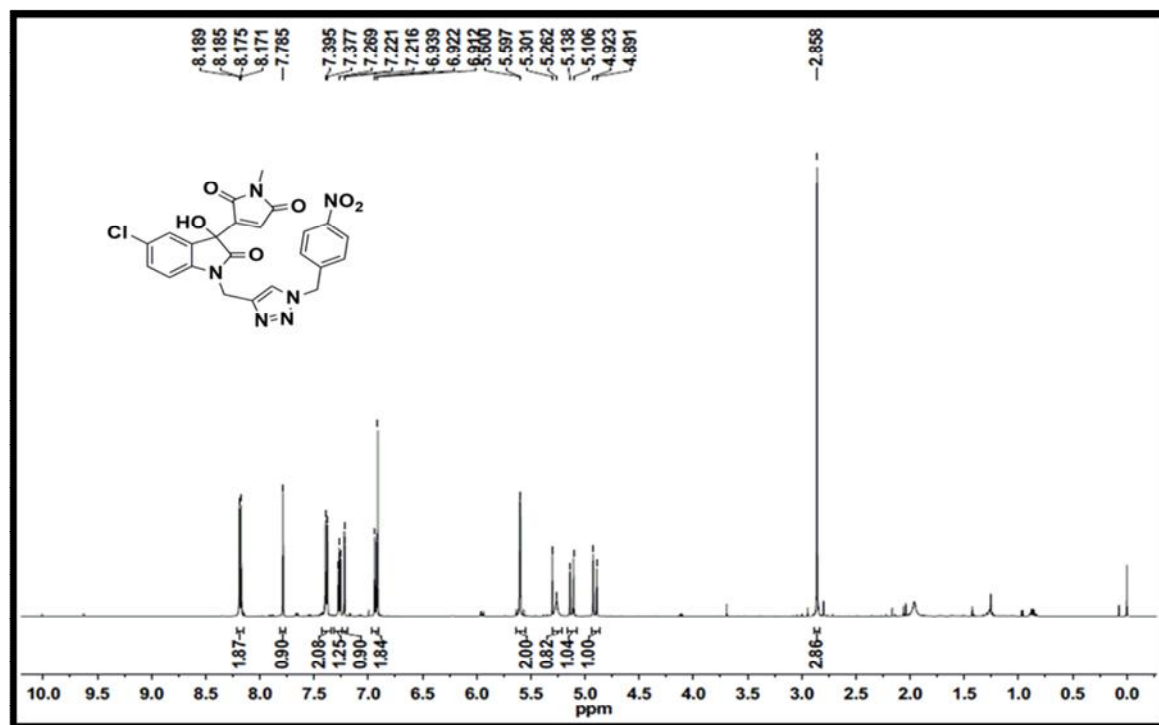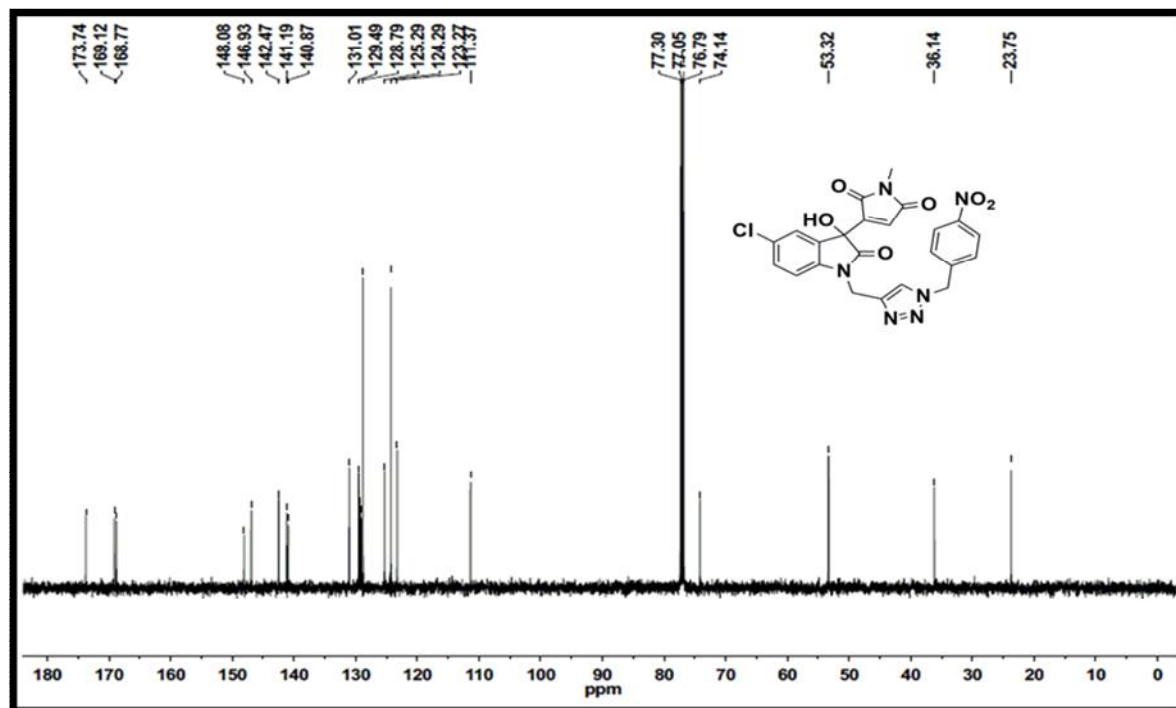

**<sup>1</sup>H and <sup>13</sup>C NMR Spectrum of Compound 4j (500 MHz, CDCl<sub>3</sub>)**

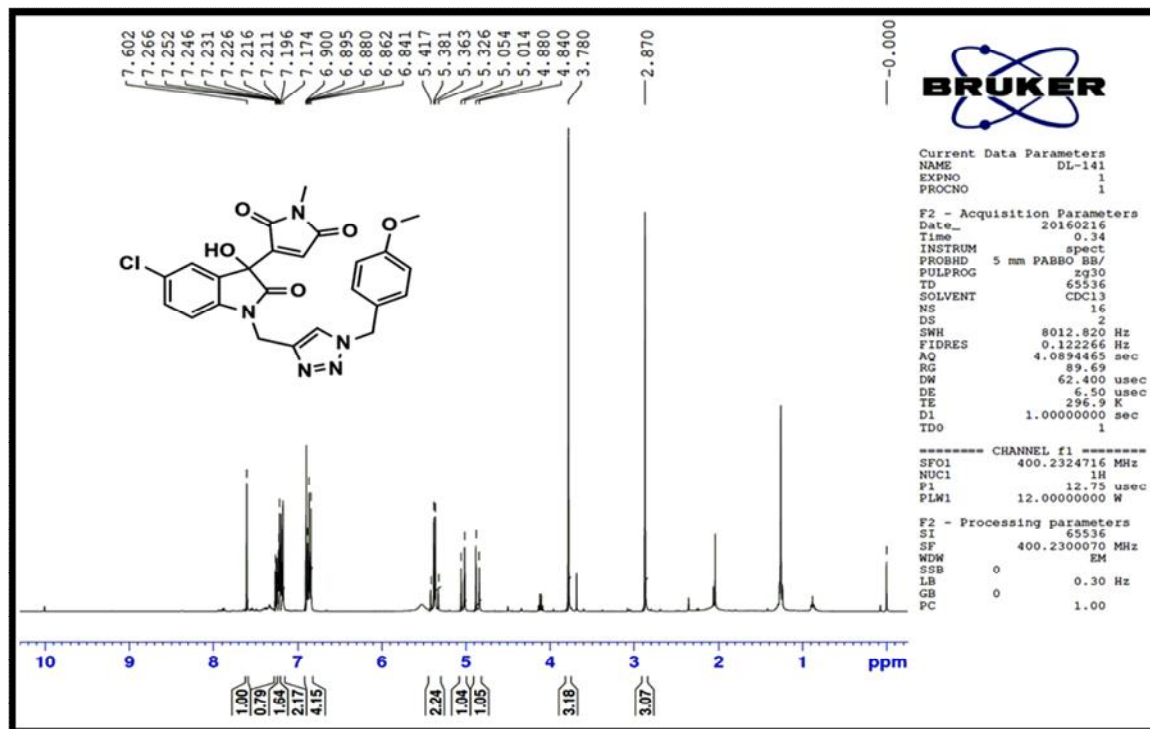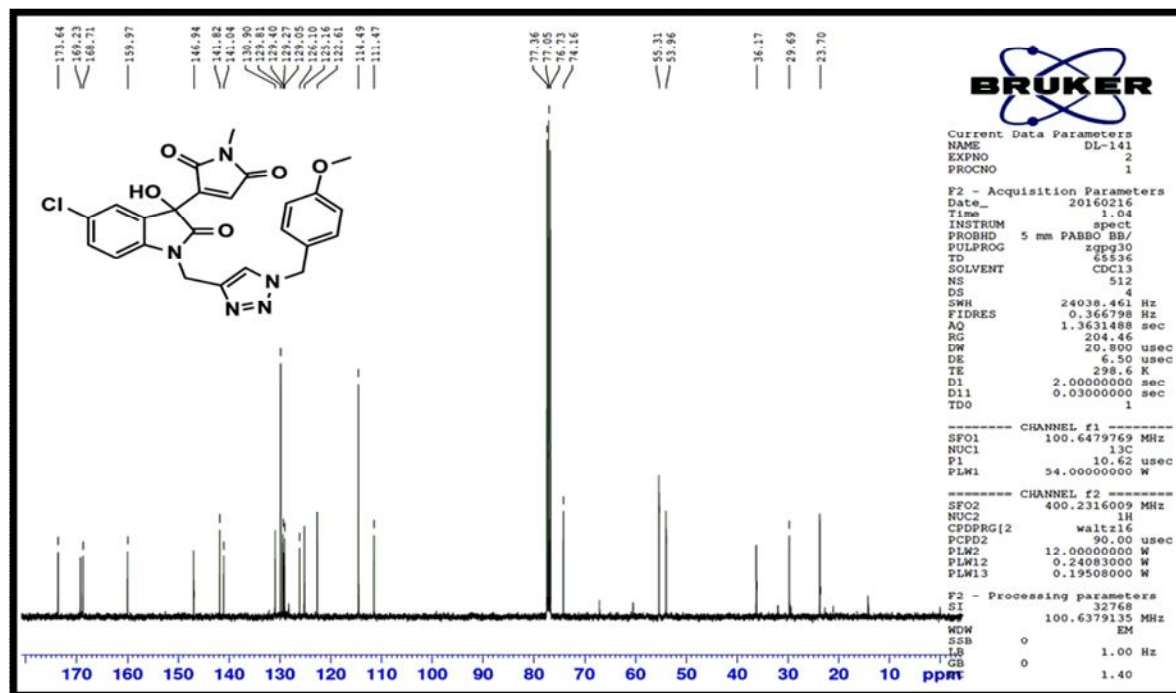

**<sup>1</sup>H and <sup>13</sup>C NMR Spectrum of Compound 4k (400 MHz, CDCl<sub>3</sub>)**

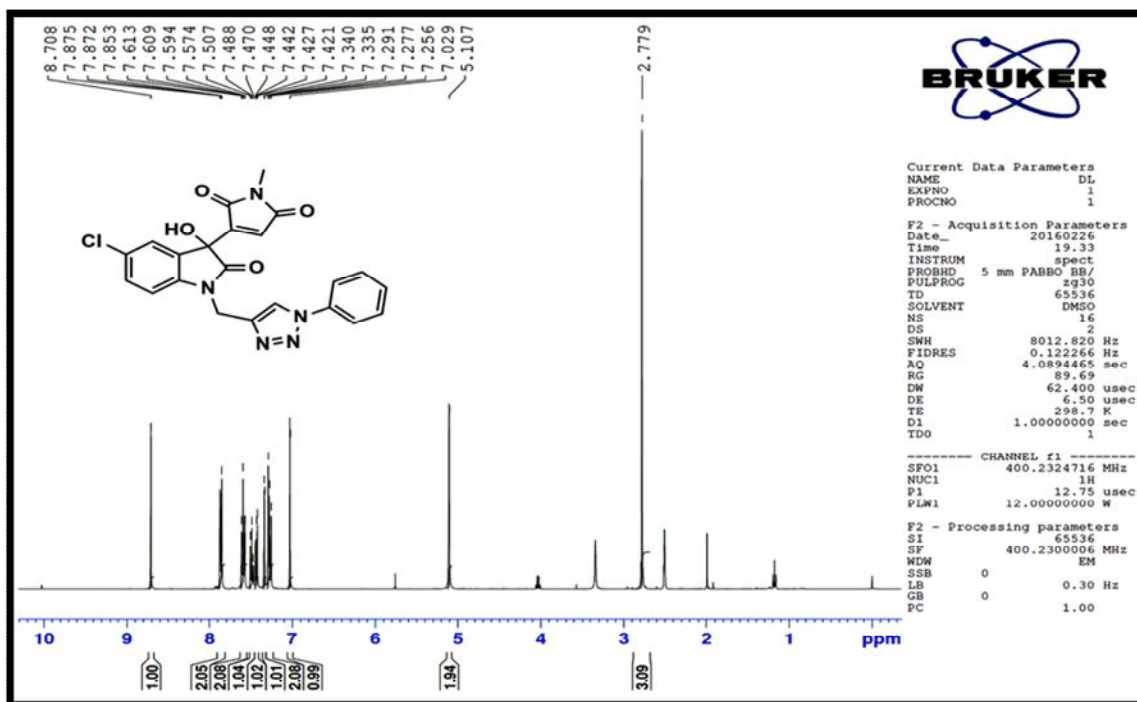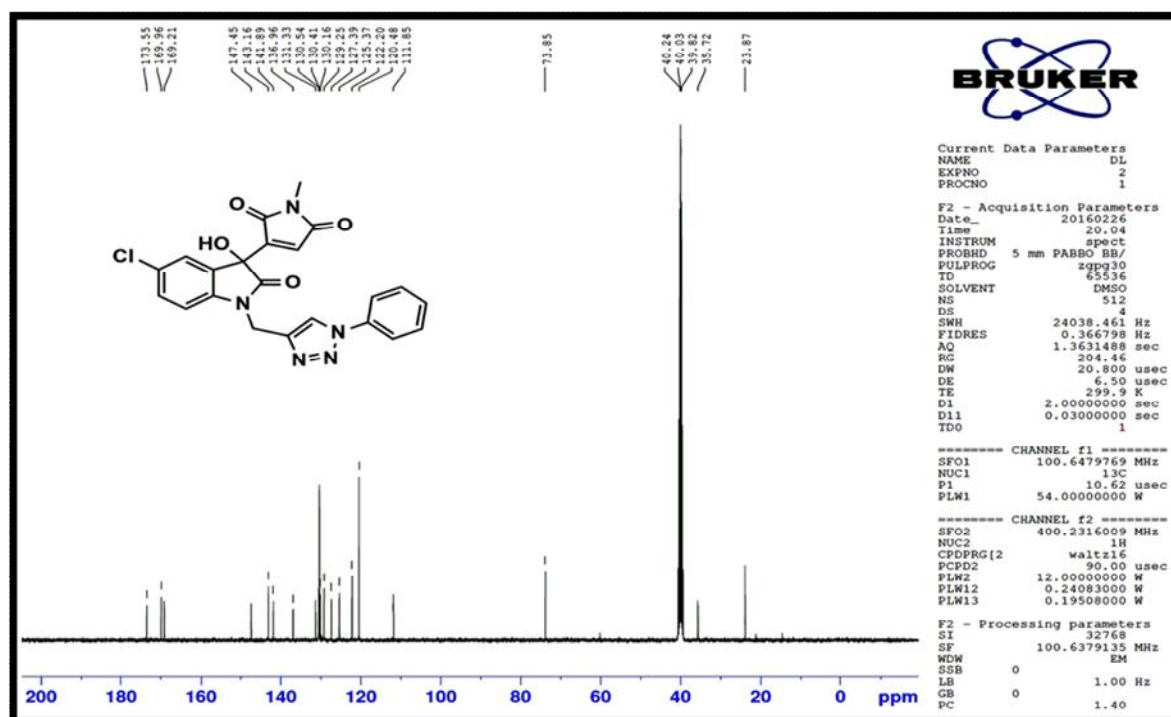

**<sup>1</sup>H and <sup>13</sup>C NMR Spectrum of Compound 4l (500 MHz, DMSO-d<sub>6</sub>)**

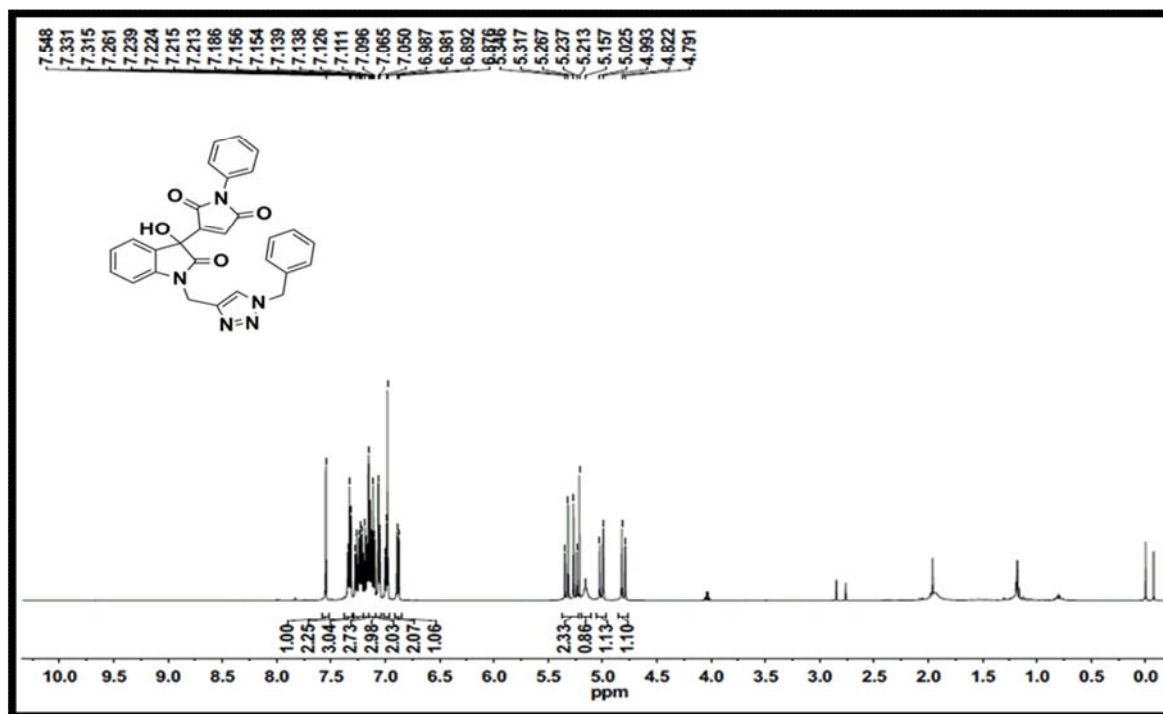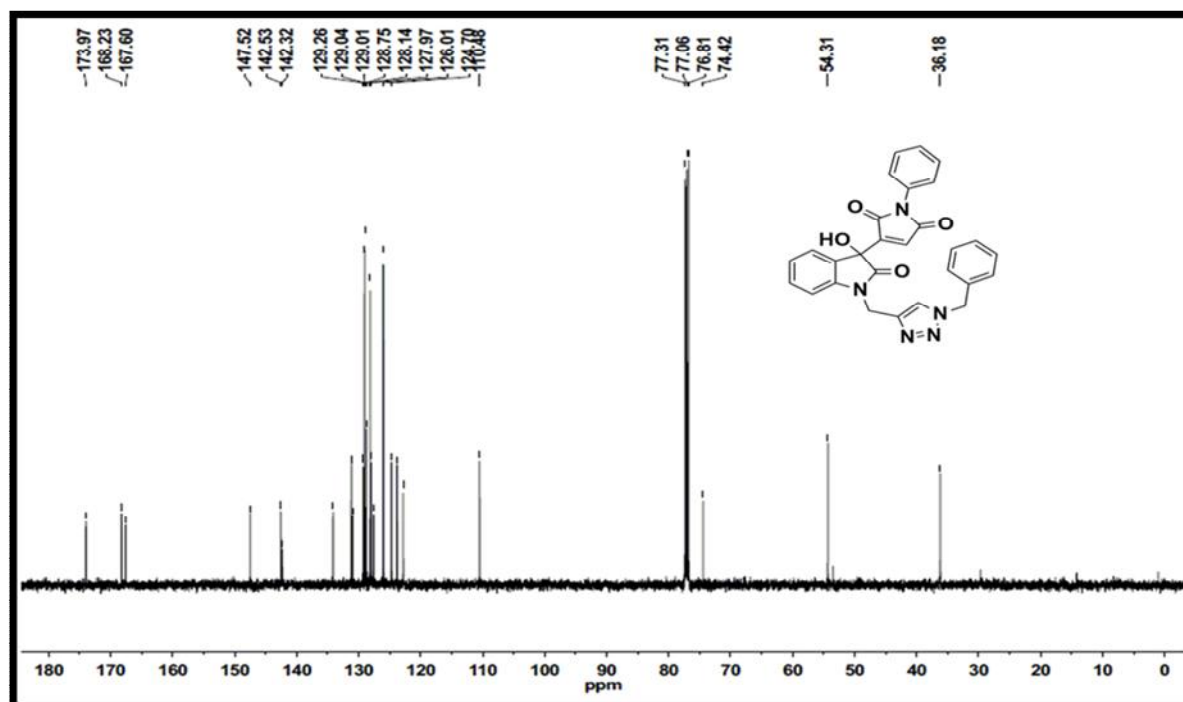

**<sup>1</sup>H and <sup>13</sup>C NMR Spectrum of Compound 4m (500 MHz, CDCl<sub>3</sub>)**



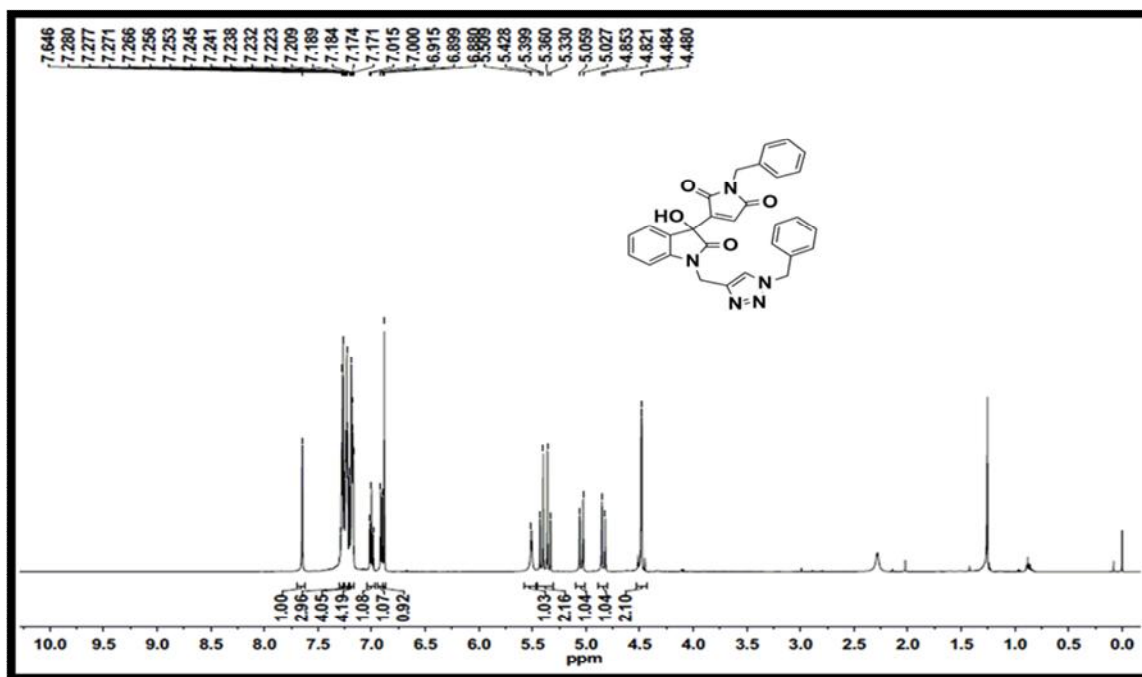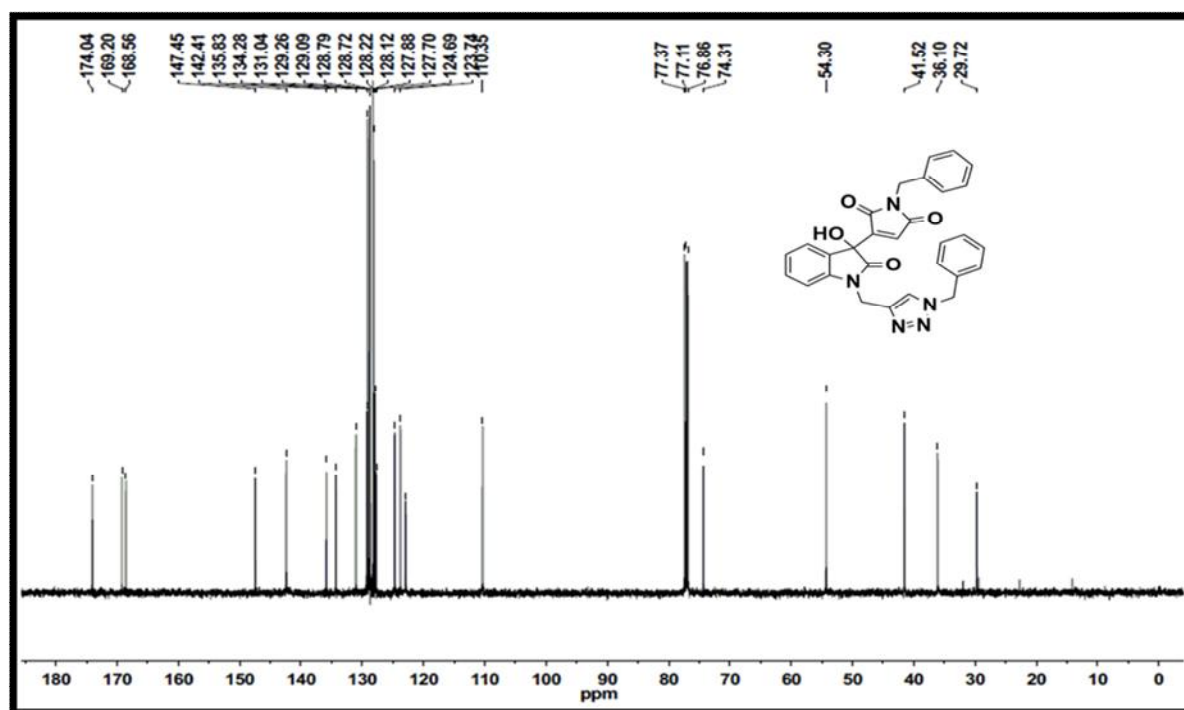

**<sup>1</sup>H and <sup>13</sup>C NMR Spectrum of Compound 4n (500 MHz, CDCl<sub>3</sub>)**



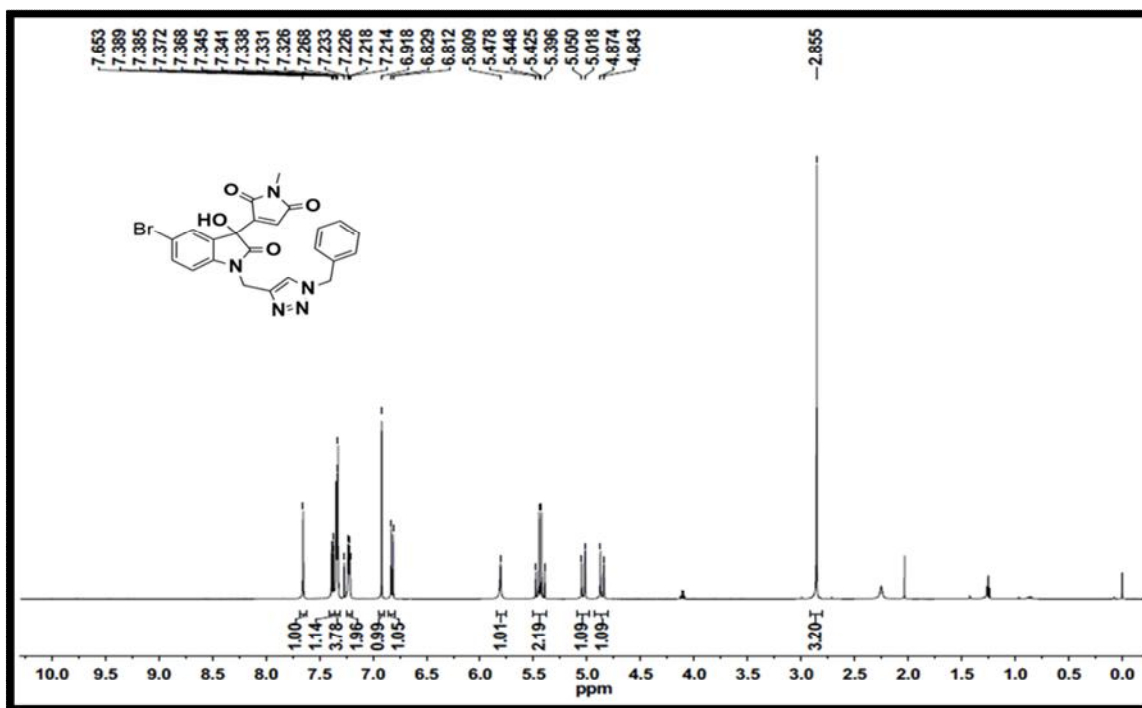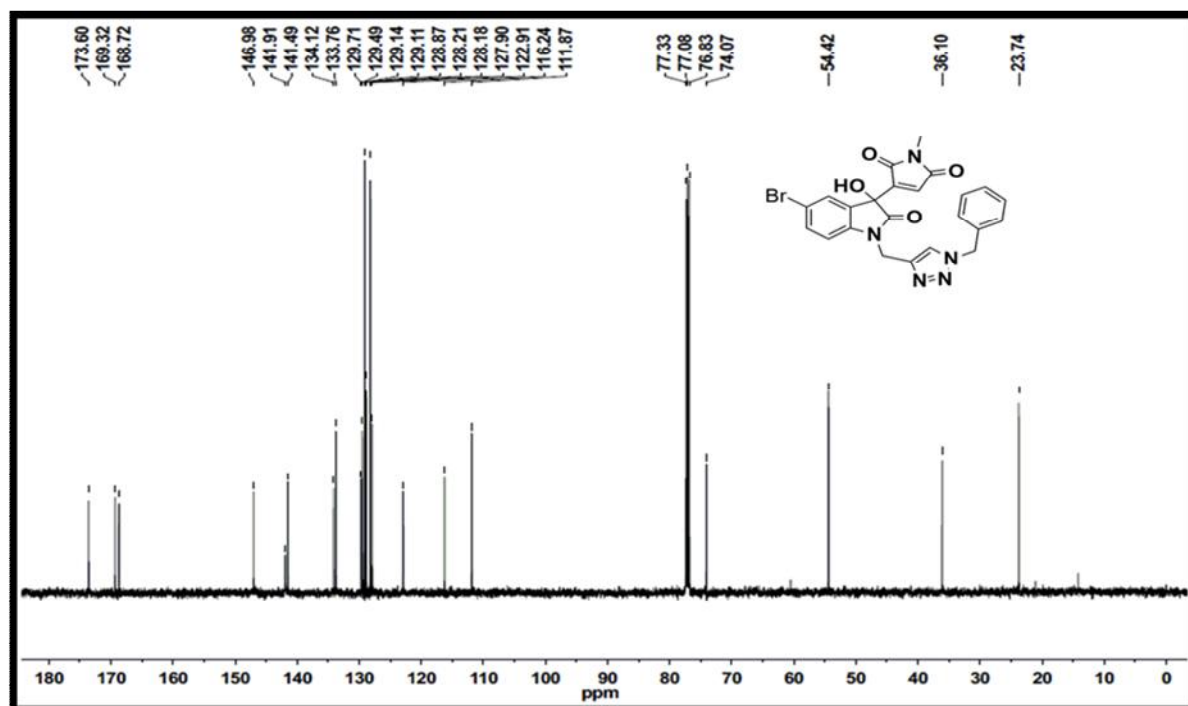

**<sup>1</sup>H and <sup>13</sup>C NMR Spectrum of Compound 4o (500 MHz, CDCl<sub>3</sub>)**

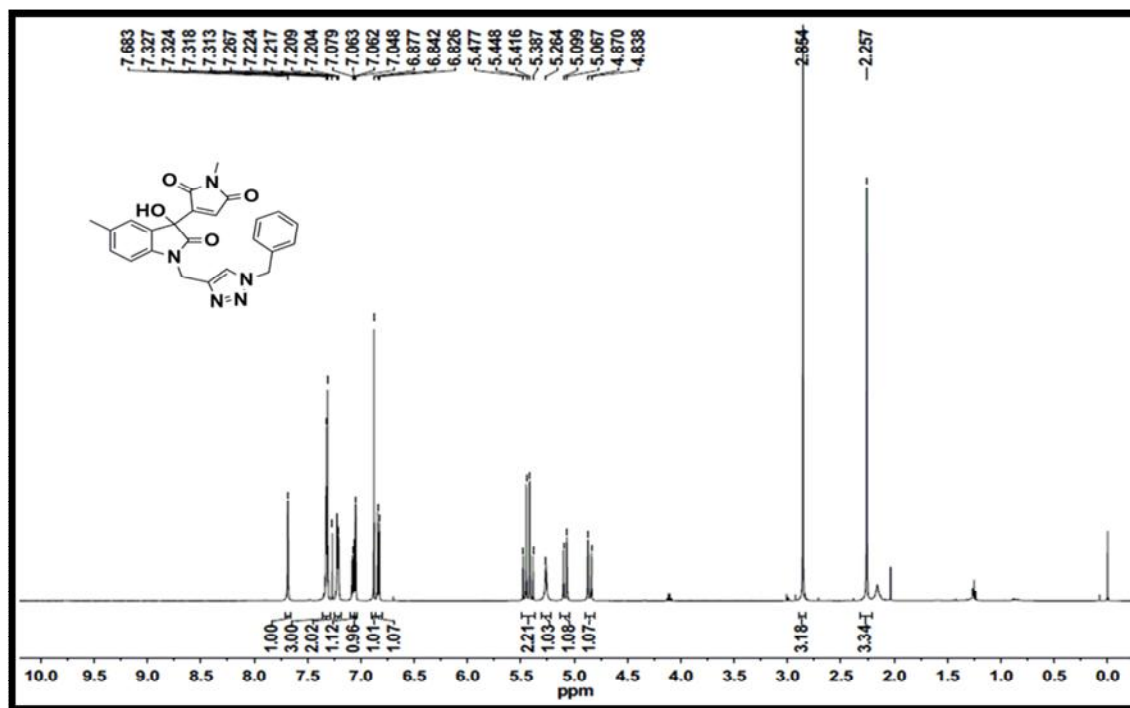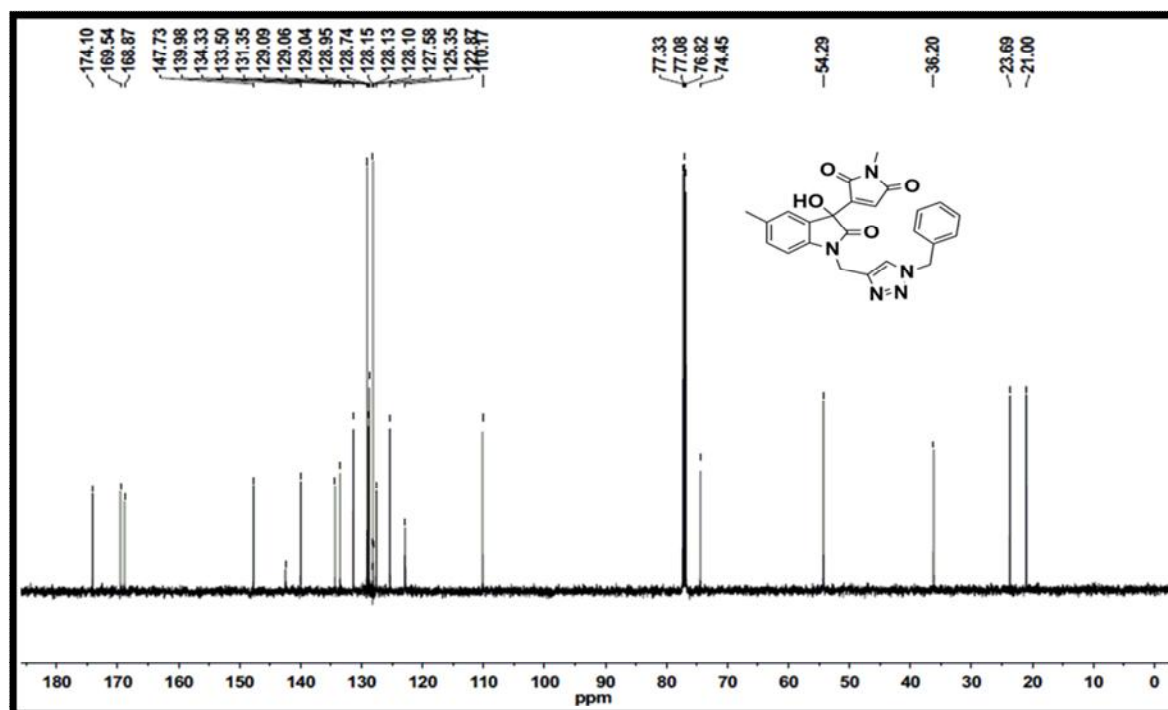

**<sup>1</sup>H and <sup>13</sup>C NMR Spectrum of Compound 4p (500 MHz, CDCl<sub>3</sub>)**

## HRMS Spectrum of Compound 4a

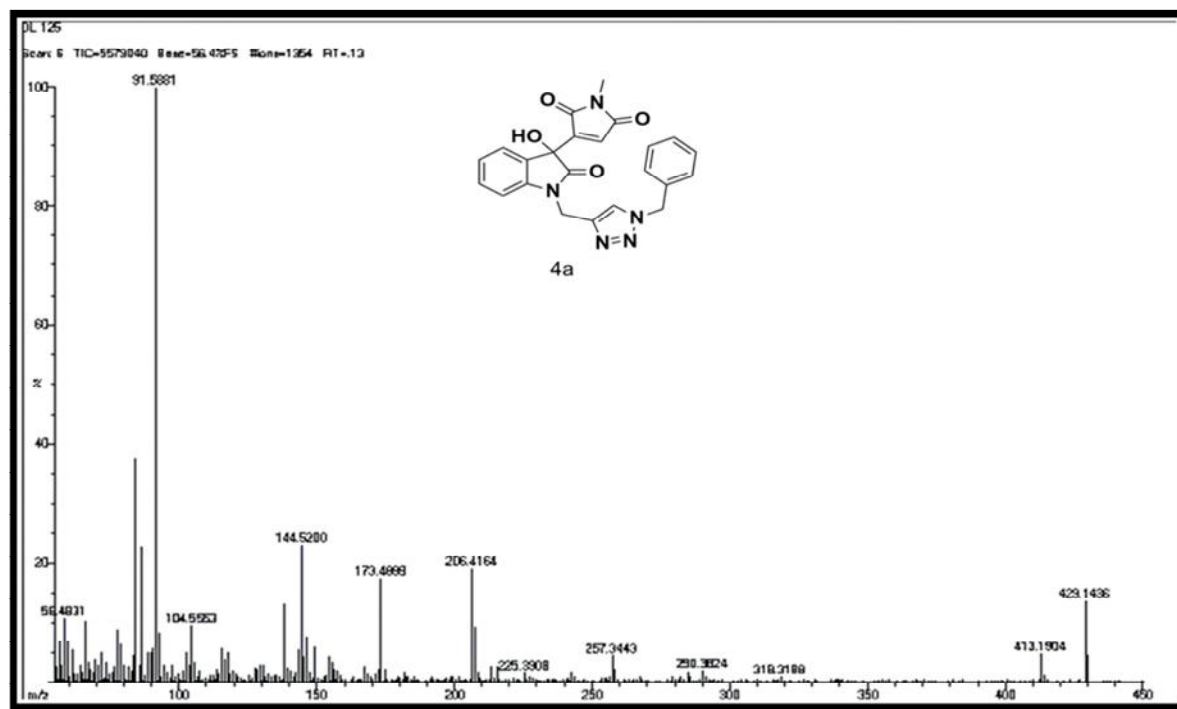

## HRMS Spectrum of Compound 4b

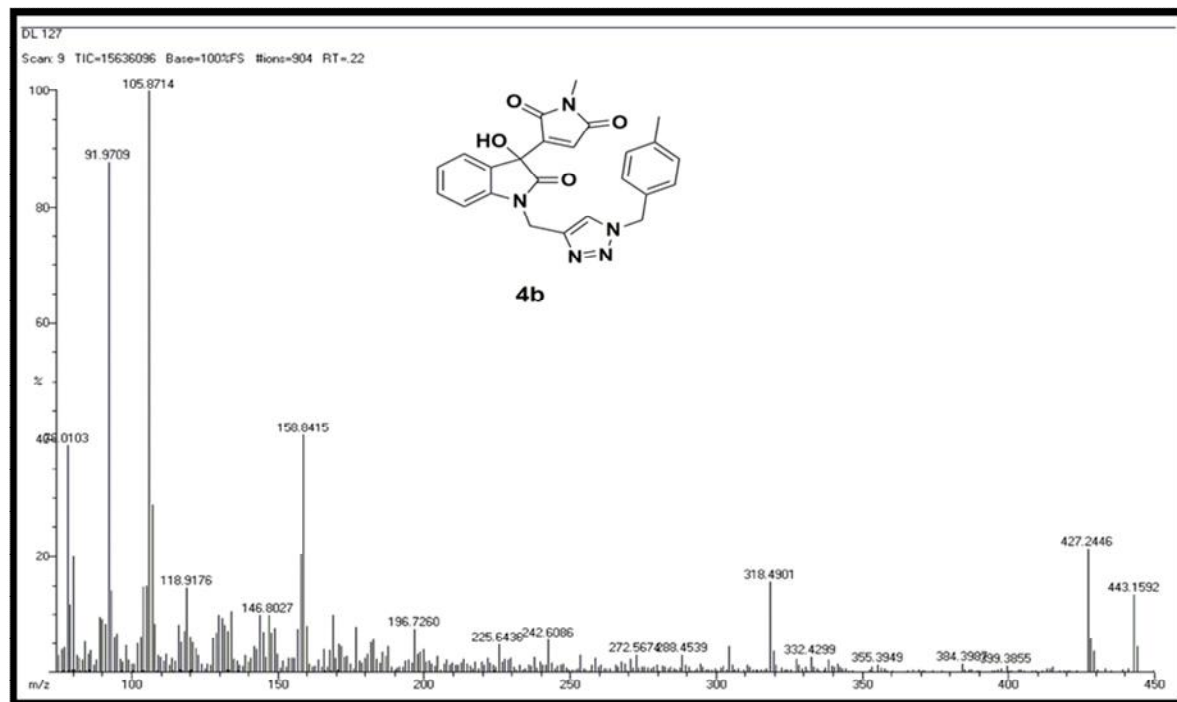

## HRMS Spectrum of Compound 4c

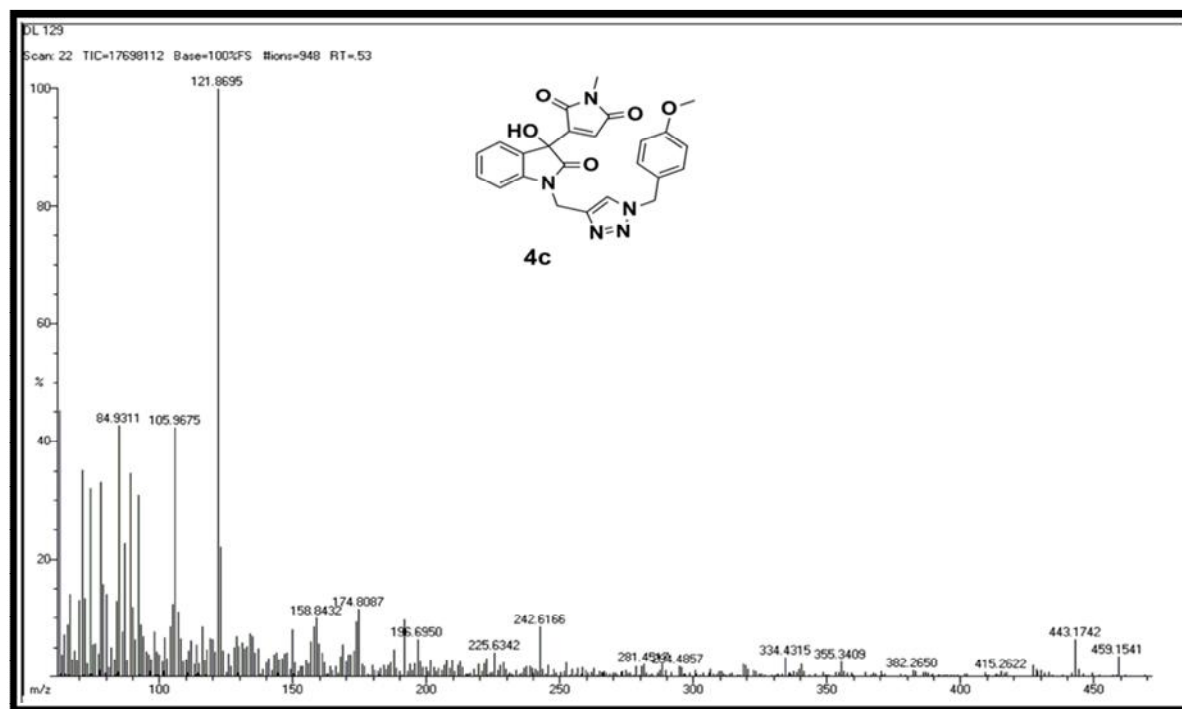

## HRMS Spectrum of Compound 4d

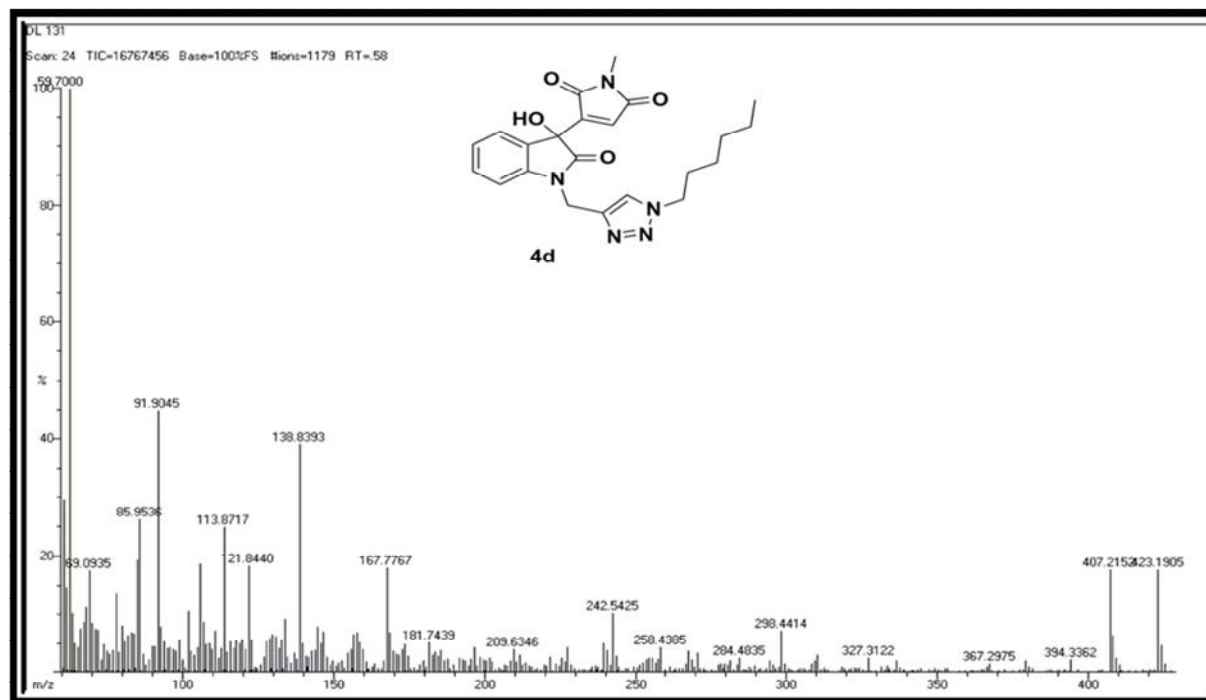

## HRMS Spectrum of Compound 4e

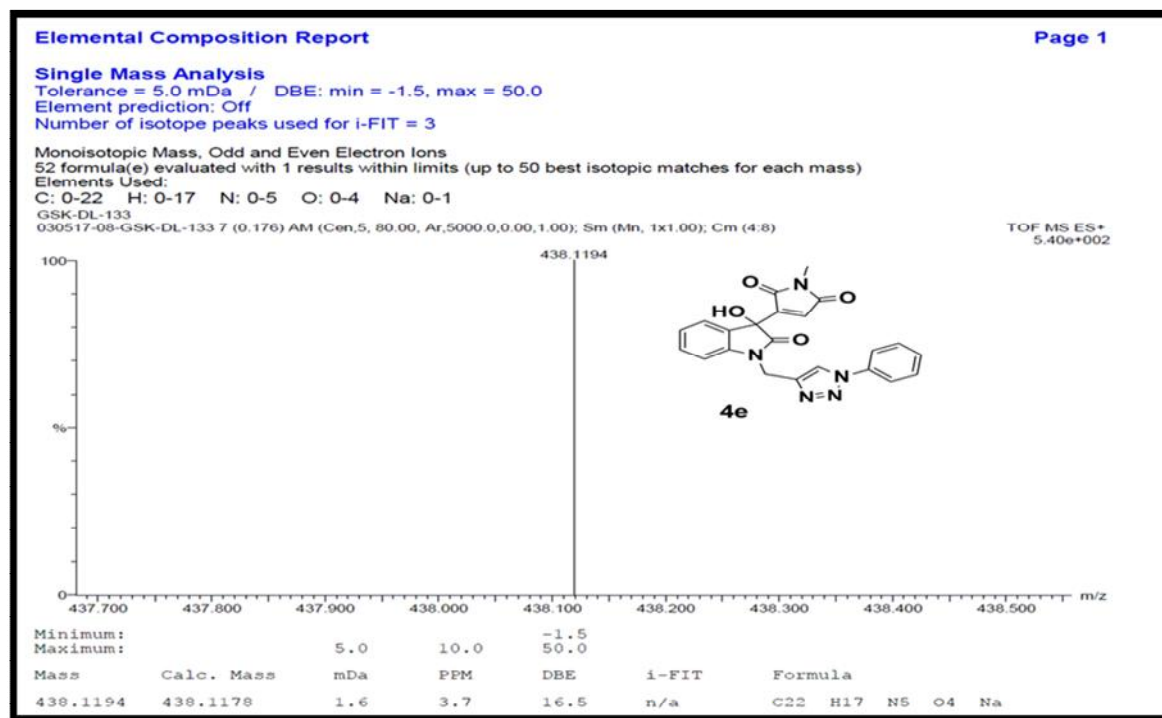

## HRMS Spectrum of Compound 4f

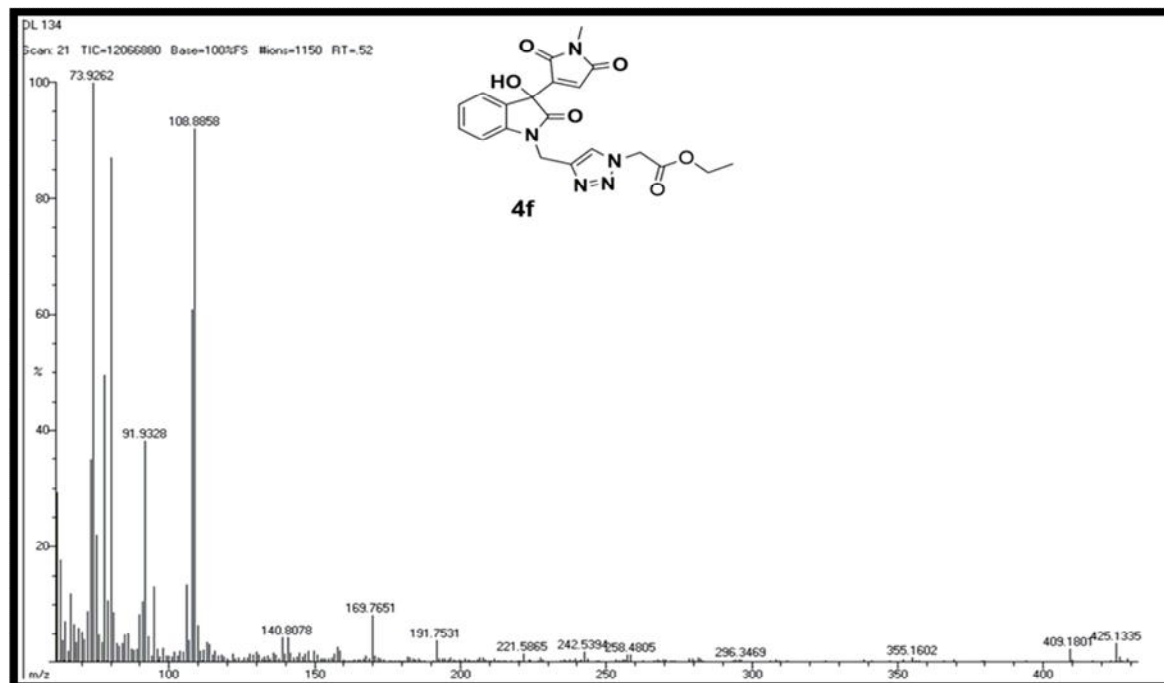

## HRMS Spectrum of Compound 4g

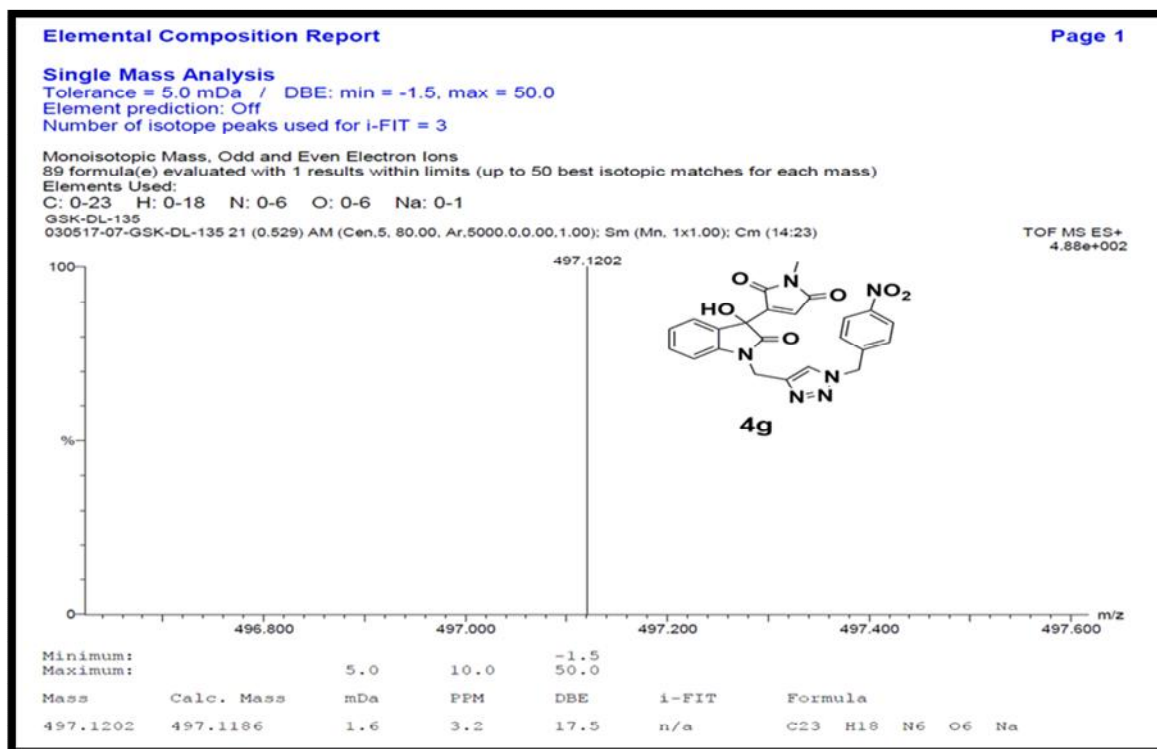

## HRMS Spectrum of Compound 4h

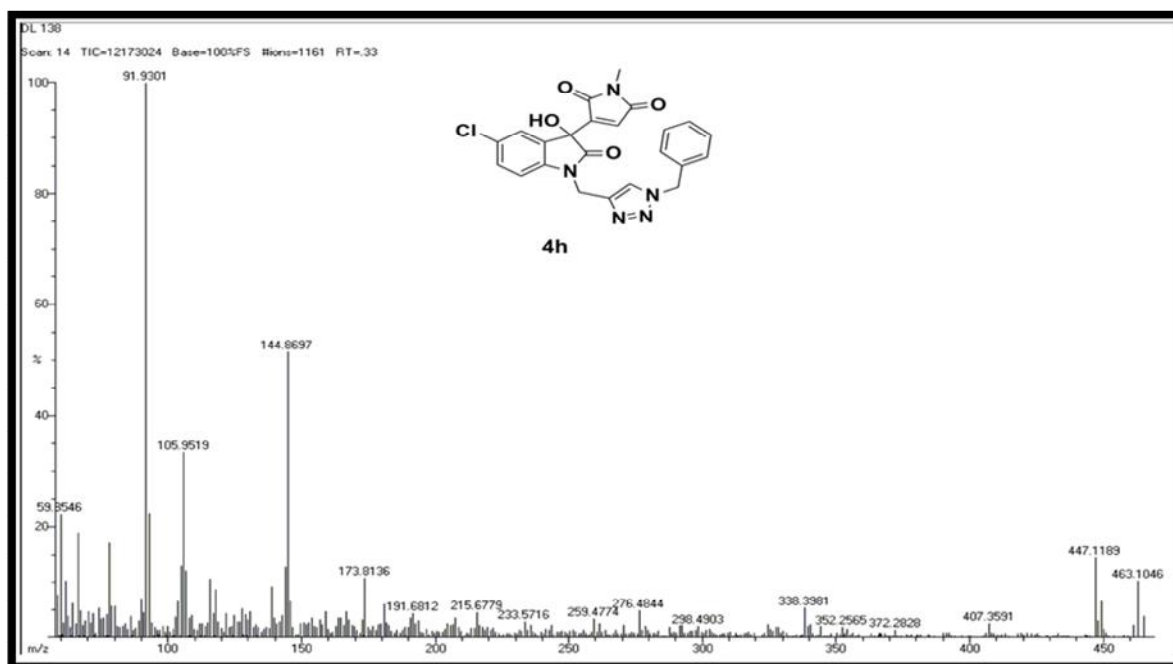

## HRMS Spectrum of Compound 4i

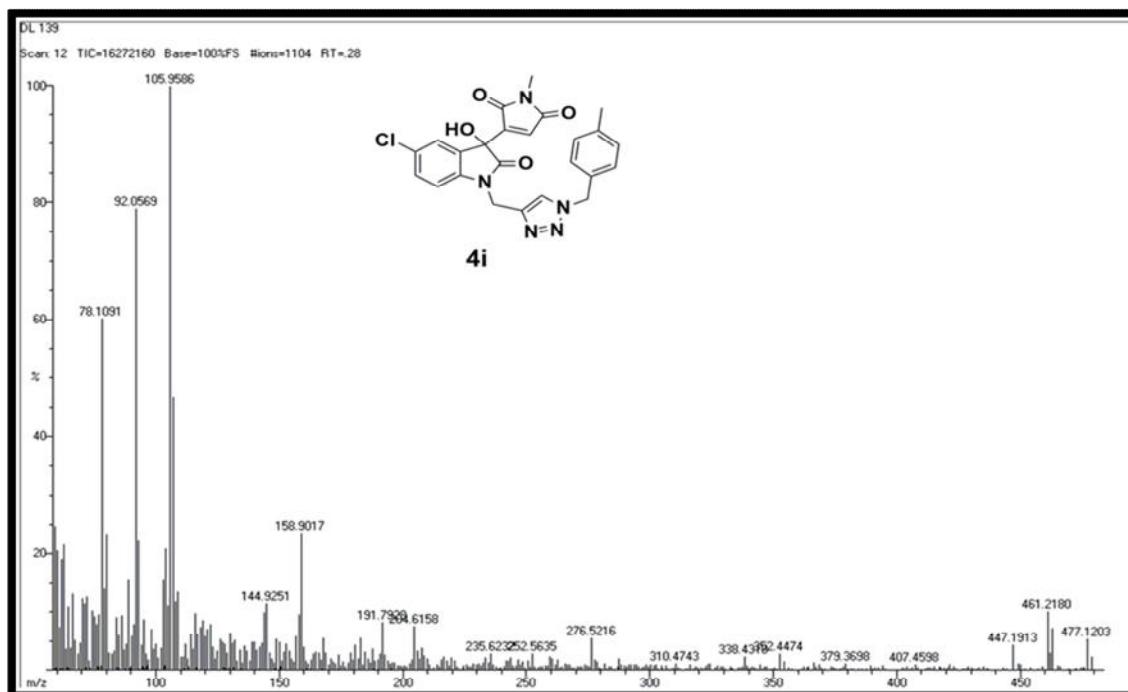

## HRMS Spectrum of Compound 4j

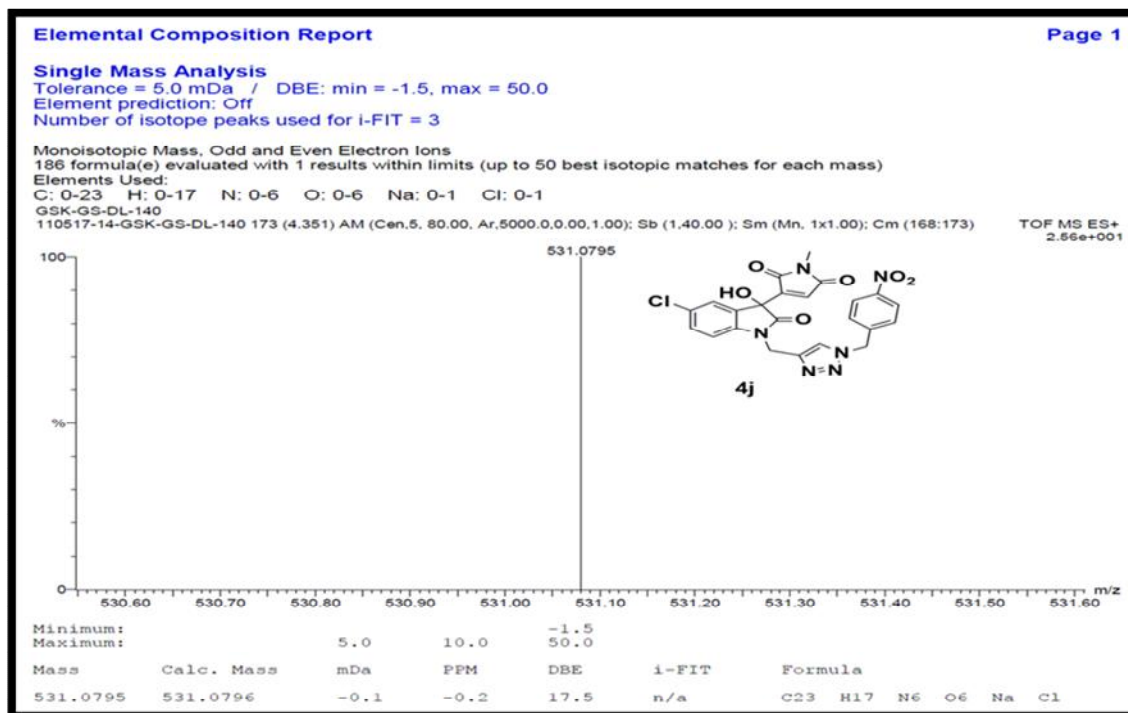



## HRMS Spectrum of Compound 4k

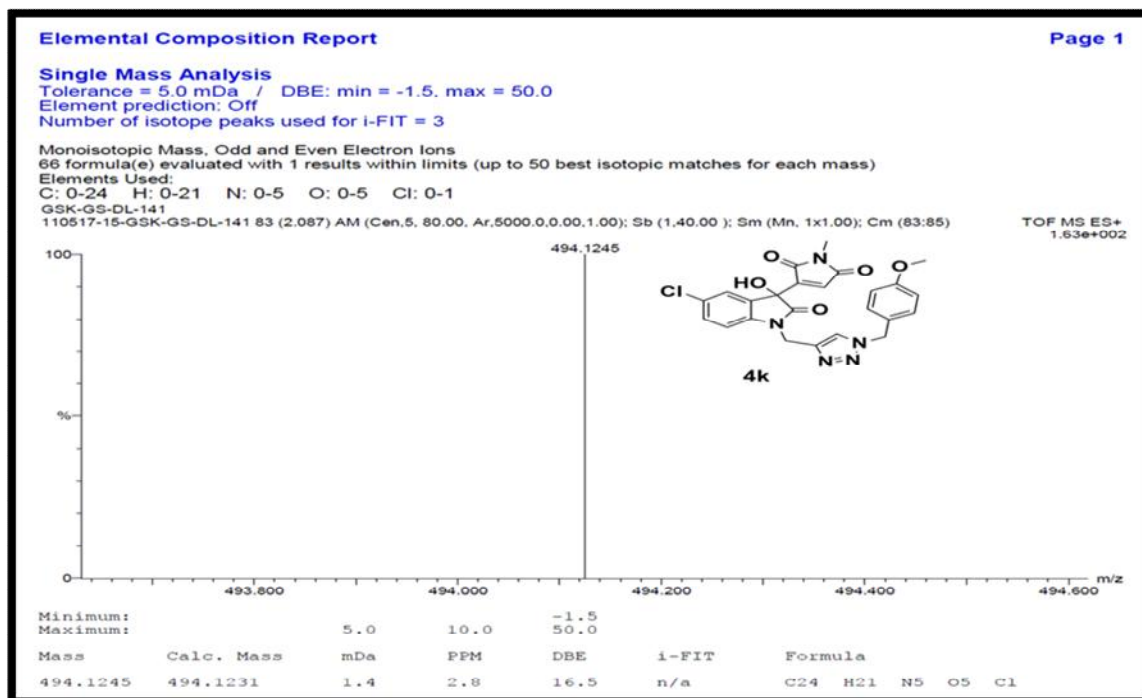

## HRMS Spectrum of Compound 4l

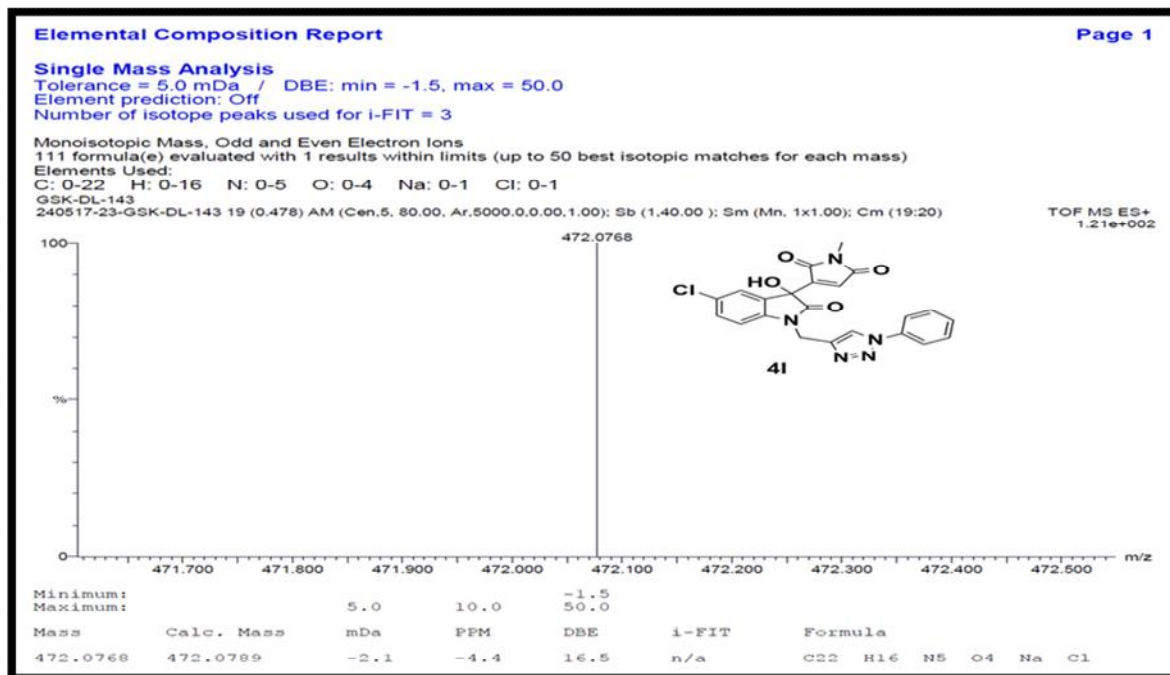

## HRMS Spectrum of Compound 4m

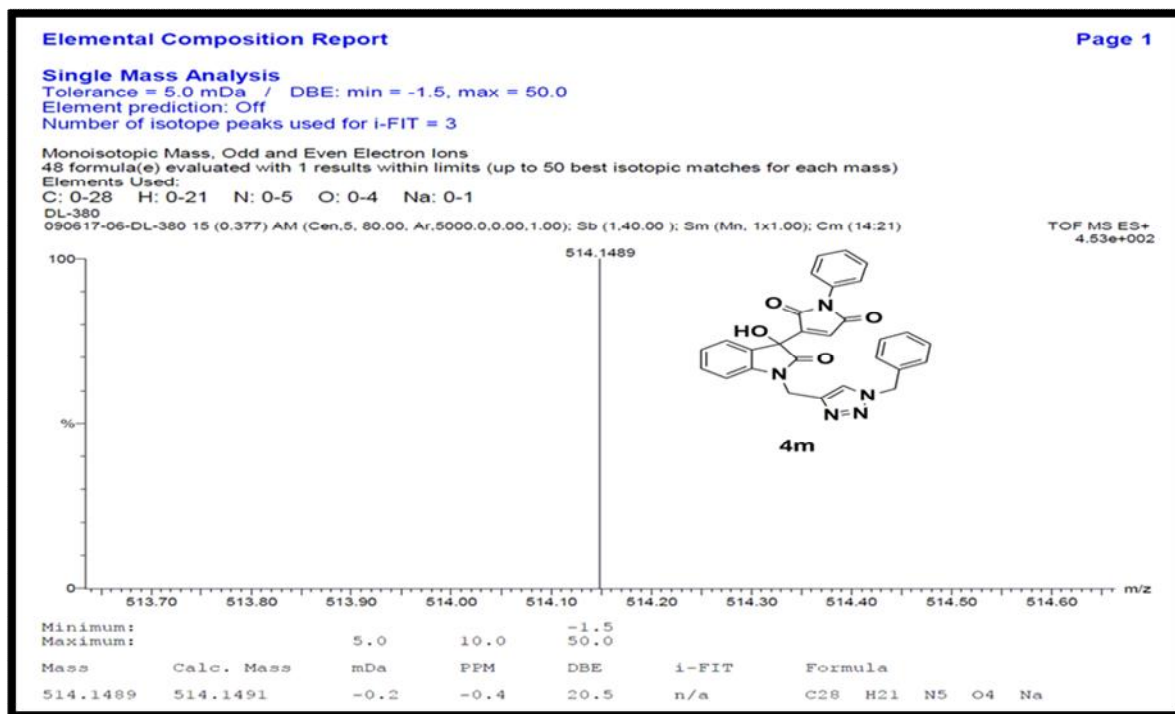

## HRMS Spectrum of Compound 4n

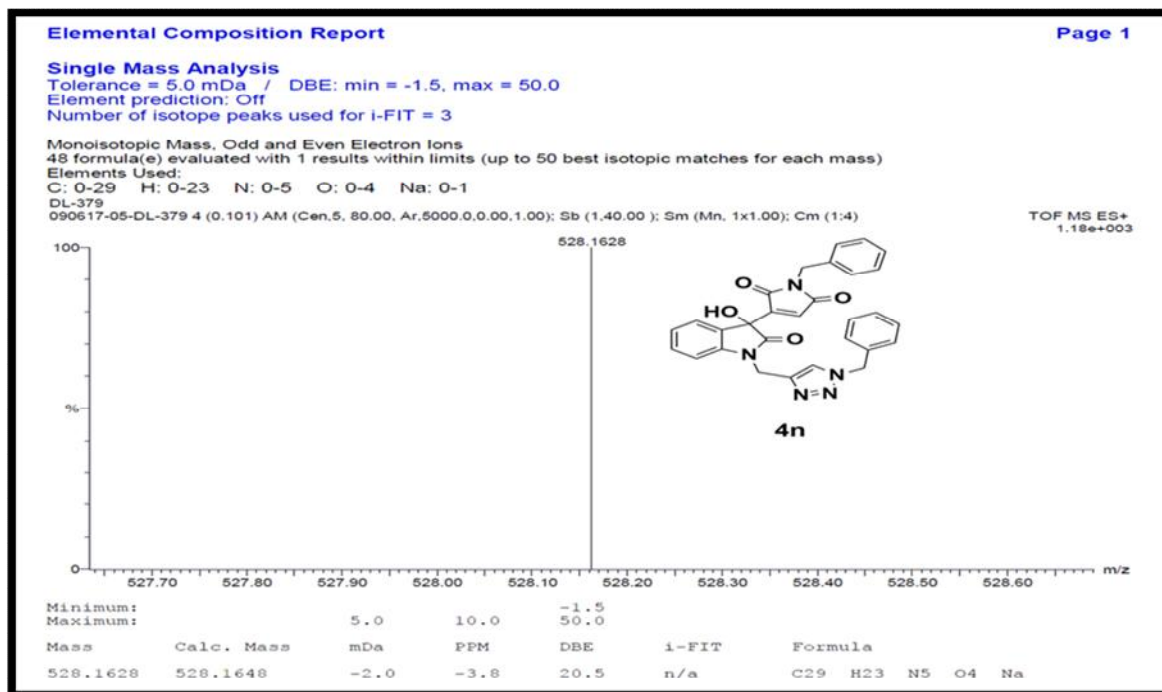

## HRMS Spectrum of Compound 4o

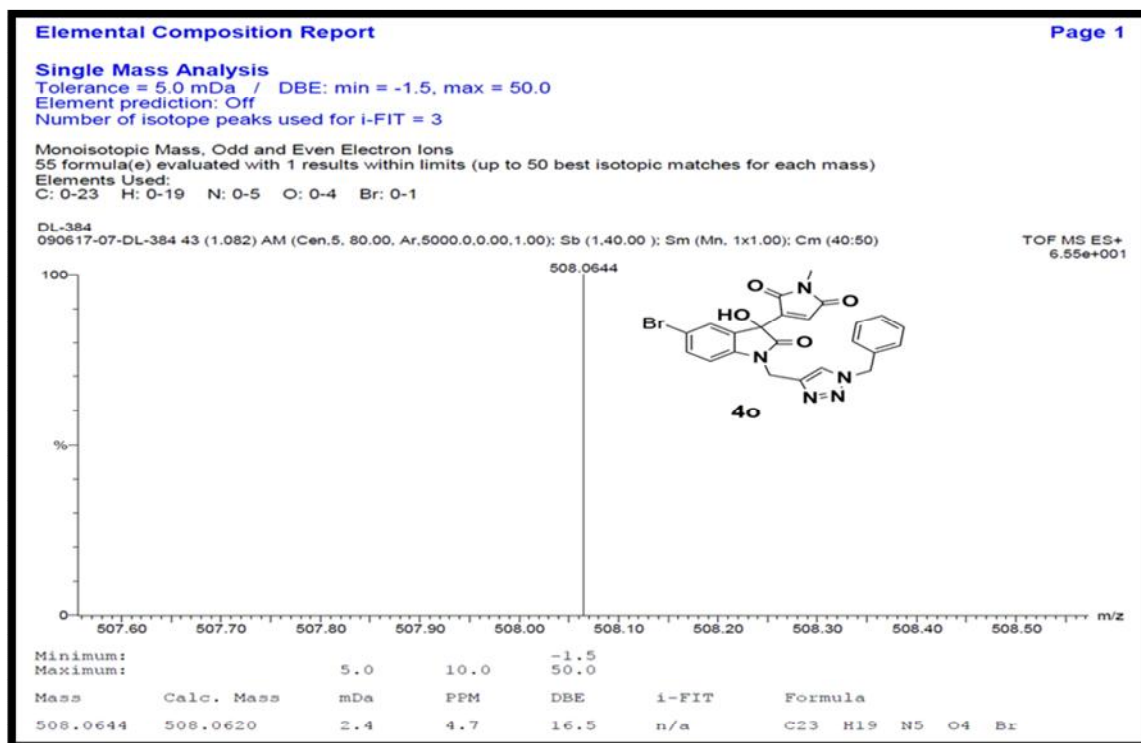

## HRMS Spectrum of Compound 4p

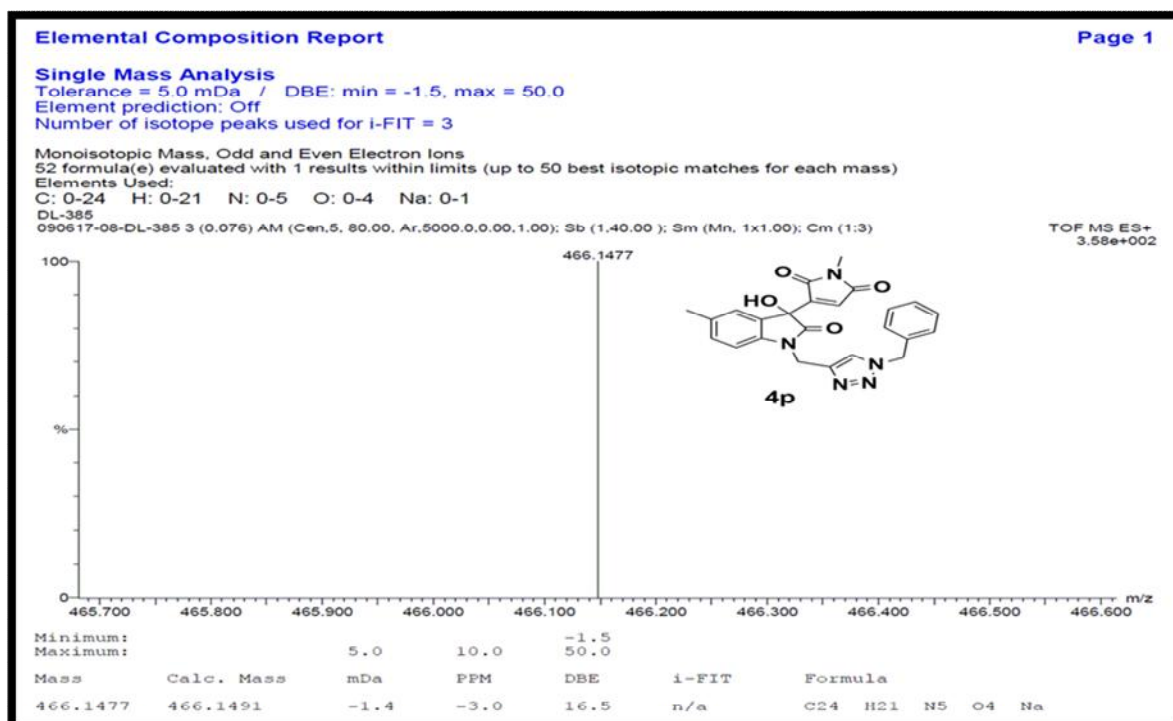

## Crystal parameters of Compound 4e

Bond precision: C-C = 0.0026 Å Wavelength=0.71073  
 Cell: a=9.7024(3) b=9.8685(3) c=12.5819(4)  
       alpha=80.421(1) beta=70.629(1) gamma=65.931(1)  
 Temperature: 296 K

|                        | Calculated          | Reported      |
|------------------------|---------------------|---------------|
| Volume                 | 1037.01(6)          | 1037.01(6)    |
| Space group            | P -1                | P -1          |
| Hall group             | -P 1                | -P 1          |
| Moiety formula         | C22 H17 N5 O4, H2 O | C22 H19 N5 O5 |
| Sum formula            | C22 H19 N5 O5       | C22 H19 N5 O5 |
| Mr                     | 433.42              | 433.42        |
| Dx, g cm <sup>-3</sup> | 1.388               | 1.388         |
| Z                      | 2                   | 2             |
| Mu (mm <sup>-1</sup> ) | 0.101               | 0.101         |
| F000                   | 452.0               | 452.0         |
| F000'                  | 452.22              |               |
| h,k,lmax               | 12,12,15            | 12,12,15      |
| Nref                   | 4266                | 4242          |
| Tmin,Tmax              | 0.982,0.988         | 0.982,0.988   |
| Tmin'                  | 0.982               |               |

Correction method= # Reported T Limits: Tmin=0.982 Tmax=0.988 AbsCorr =  
 MULTI-SCAN

Data completeness= 0.994 Theta(max)= 26.390  
 R(reflections)= 0.0382( 3447) wR2(reflections)= 0.1107( 4242)  
 S = 1.034 Npar= 300

## HPLC of racemic 4a

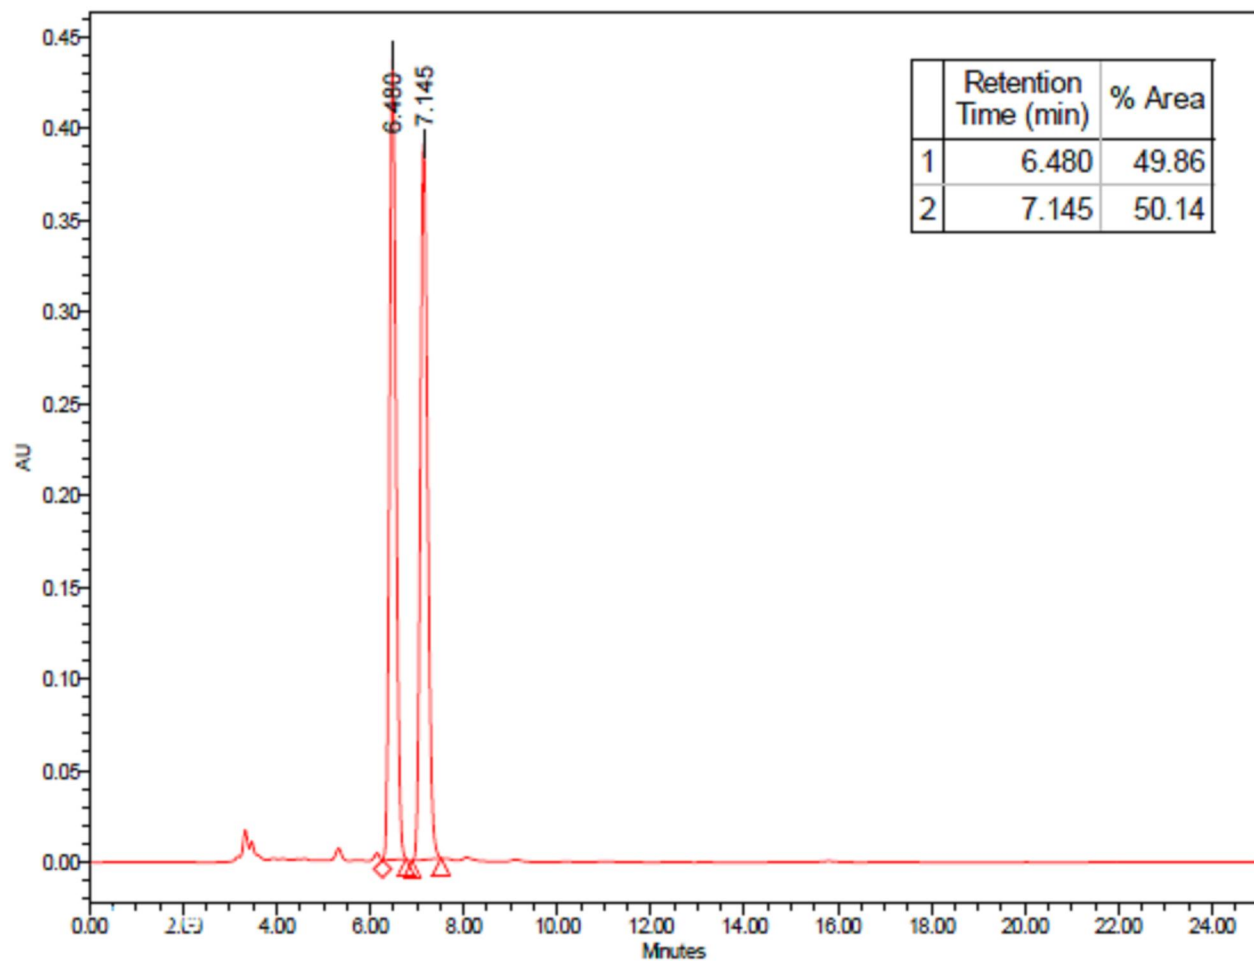

## HPLC of enantioexcess 4a'

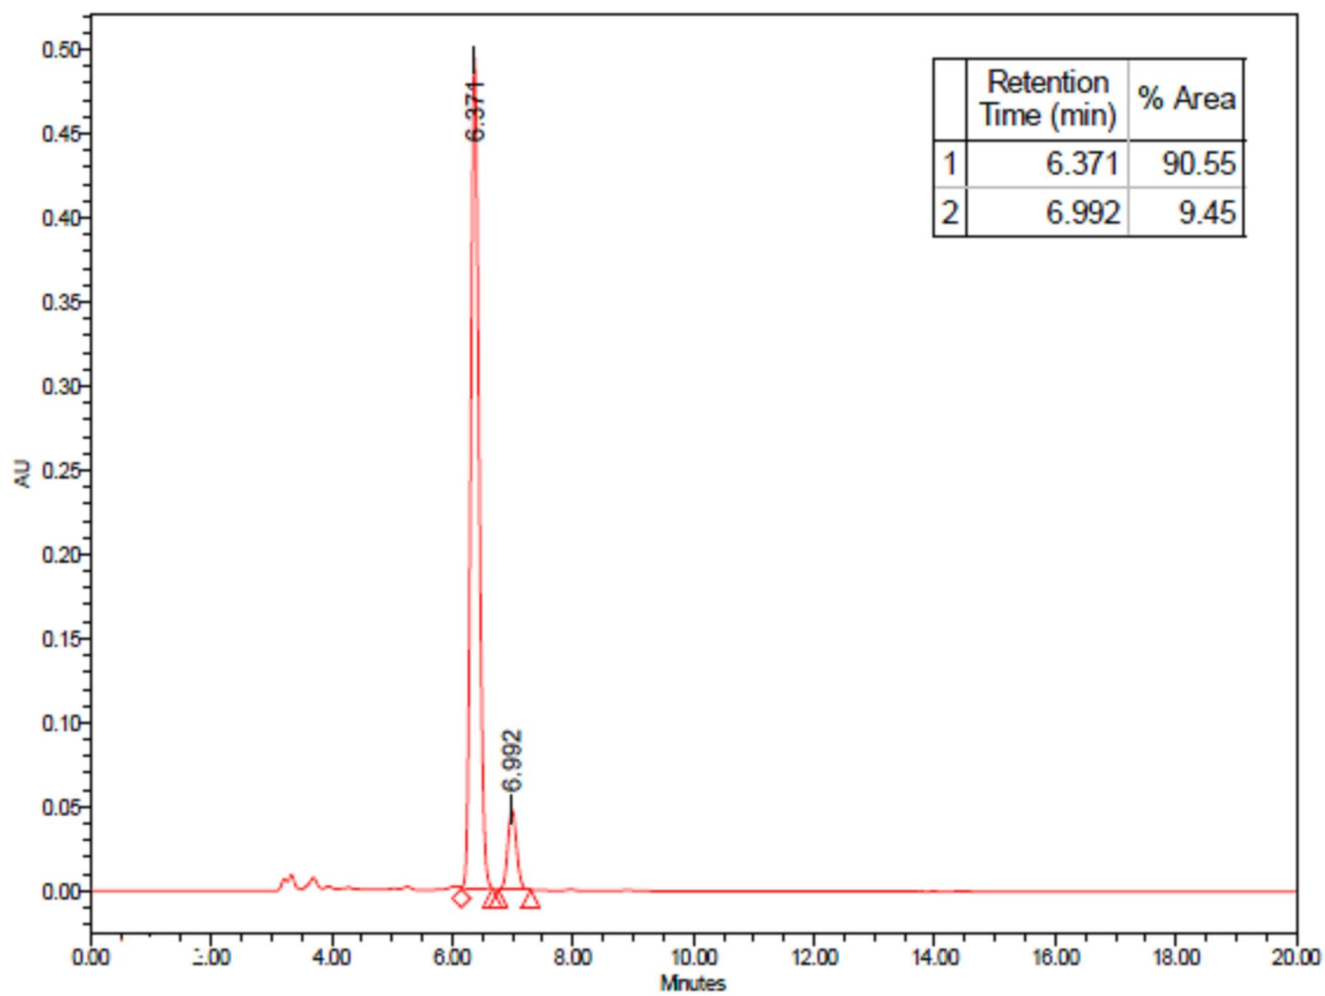



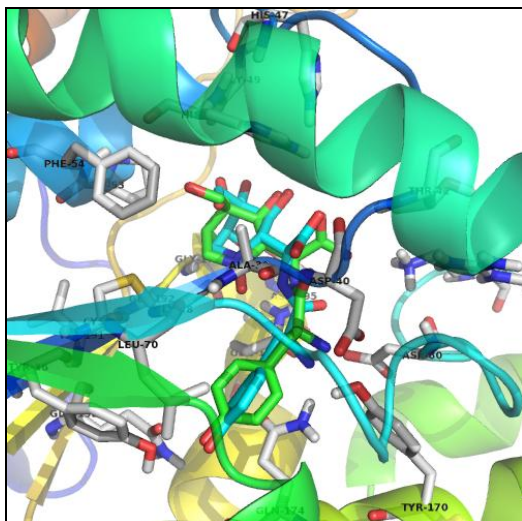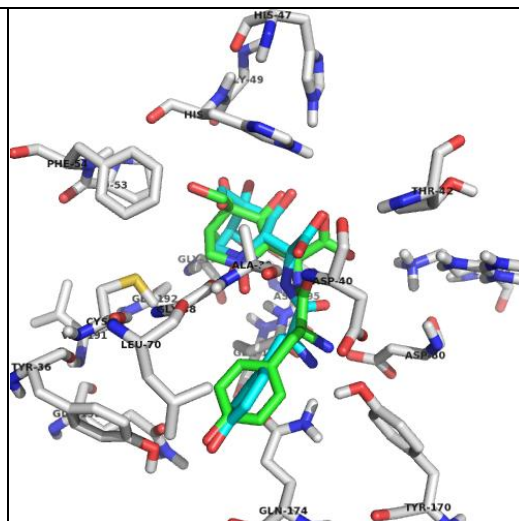

**Method validation using crystallised and docked ligand with 1JIJ receptor**

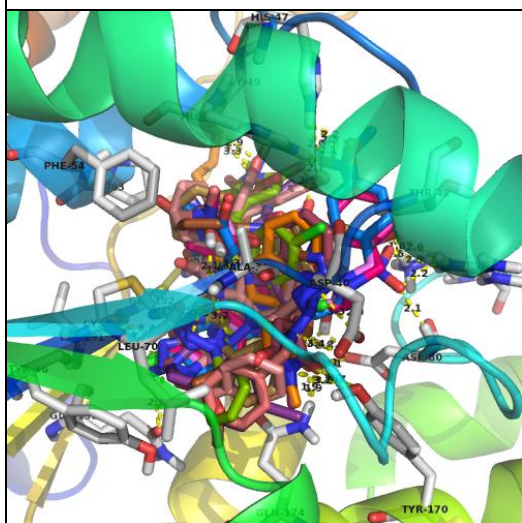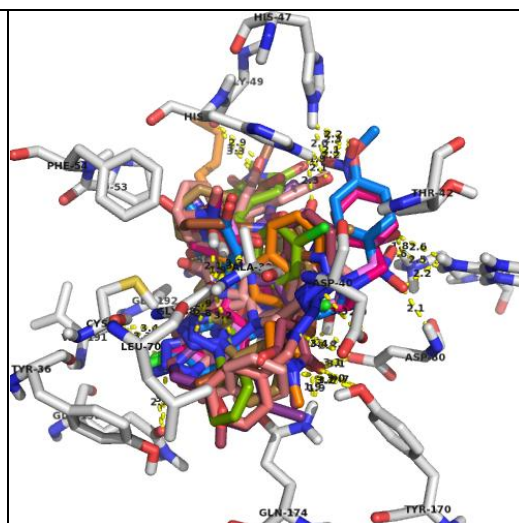

**Docking mode of all the compounds in the active site of 1JIJ receptor**



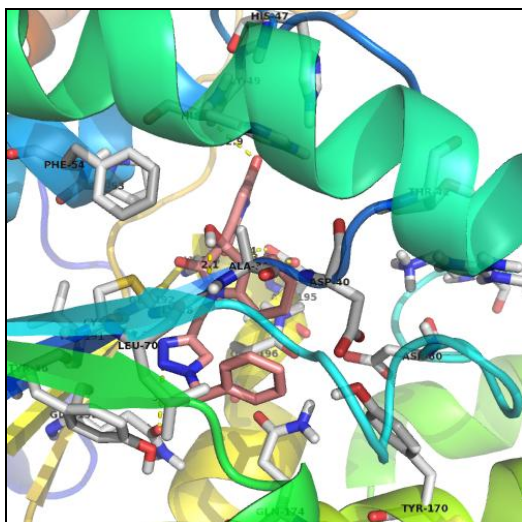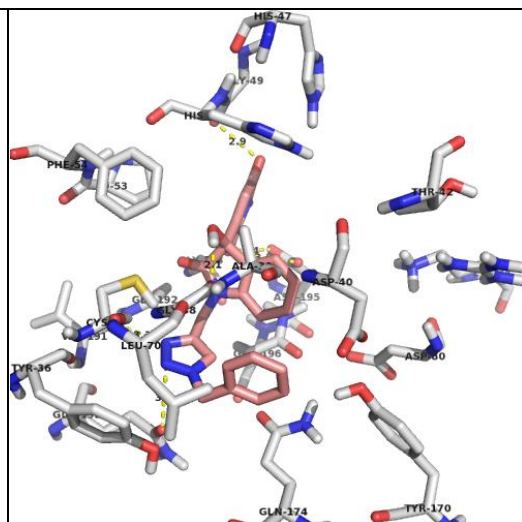

**Docking mode of the compound 4a in the active site of 1JIJ**

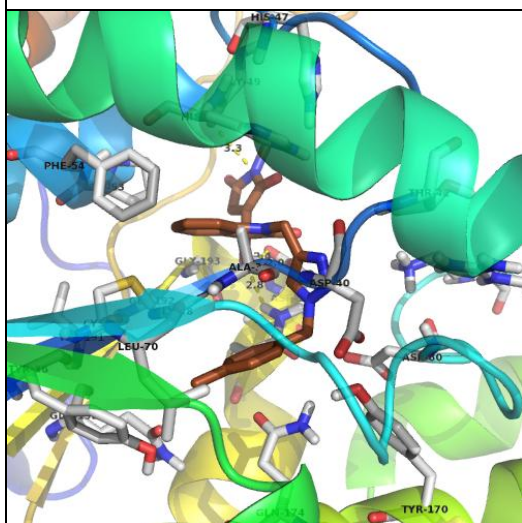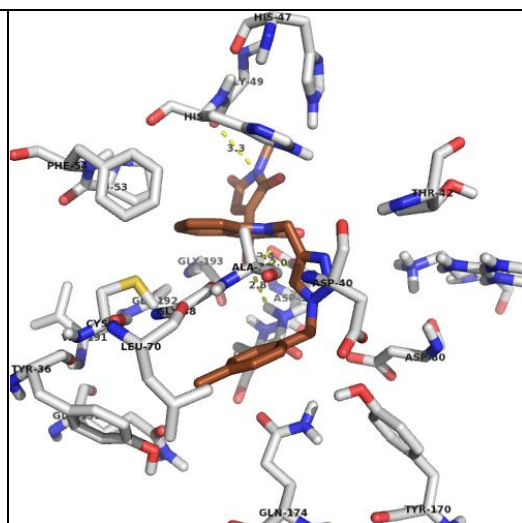

**Docking mode of the compound 4b in the active site of 1JIJ**

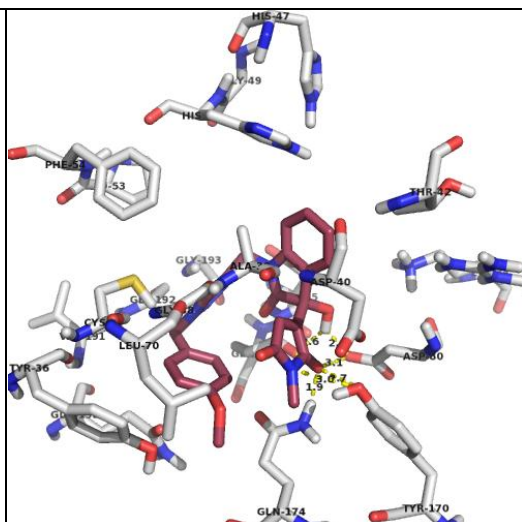

### Docking mode of the compound 4c in the active site of 1JJ

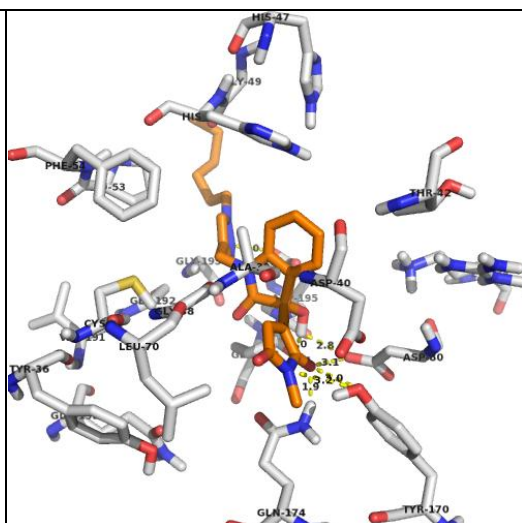

### Docking mode of the compound 4d in the active site of 1JJJ

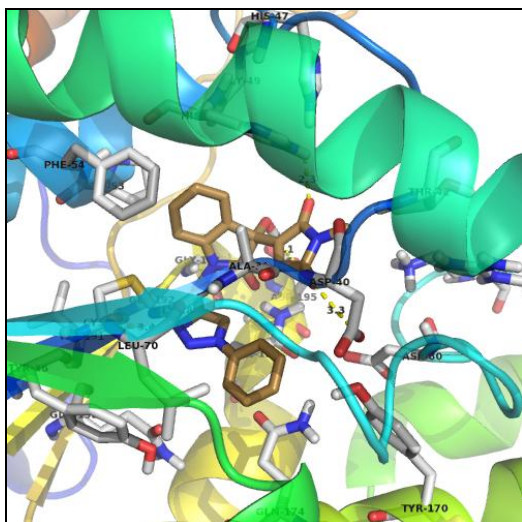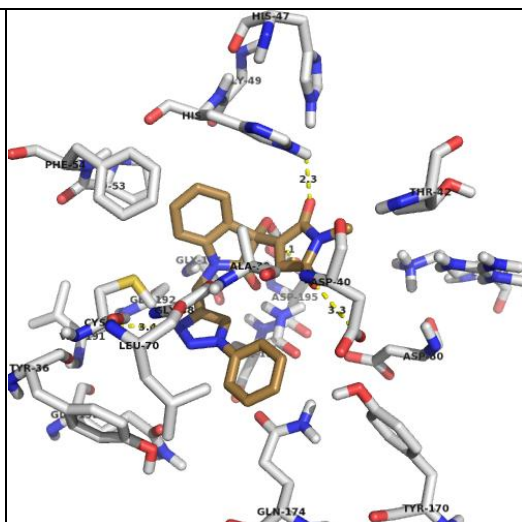

**Docking mode of the compound 4e in the active site of 1JIJ**

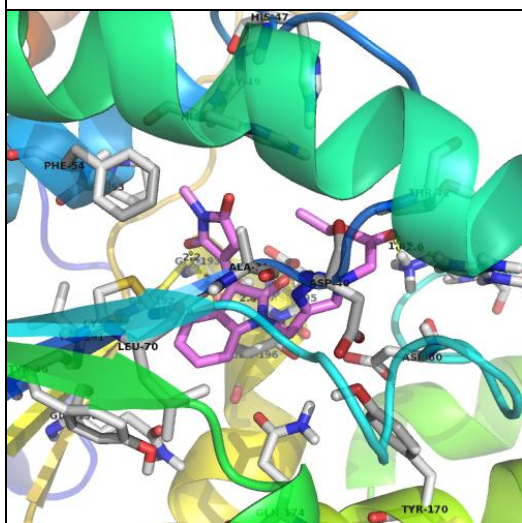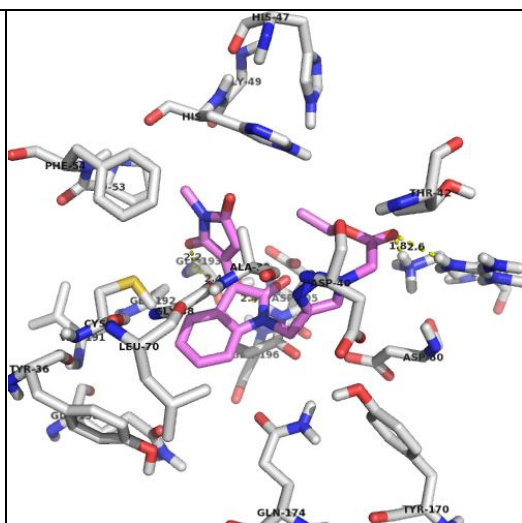

**Docking mode of the compound 4f in the active site of 1JIJ**



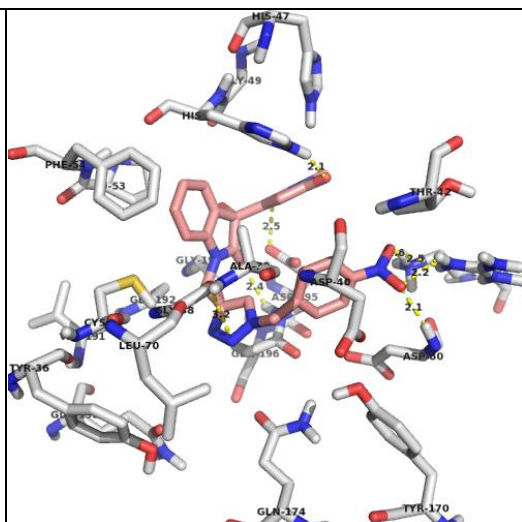

### Docking mode of the compound 4g in the active site of 1JJJ

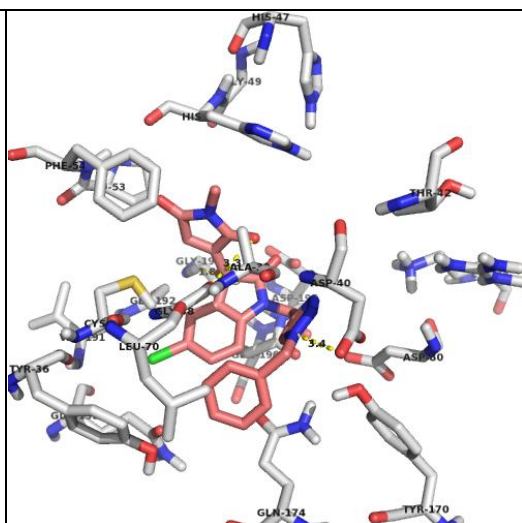

### Docking mode of the compound 4h in the active site of 1JIJ

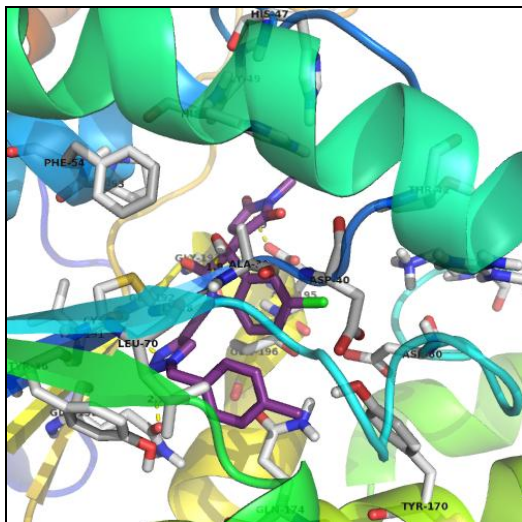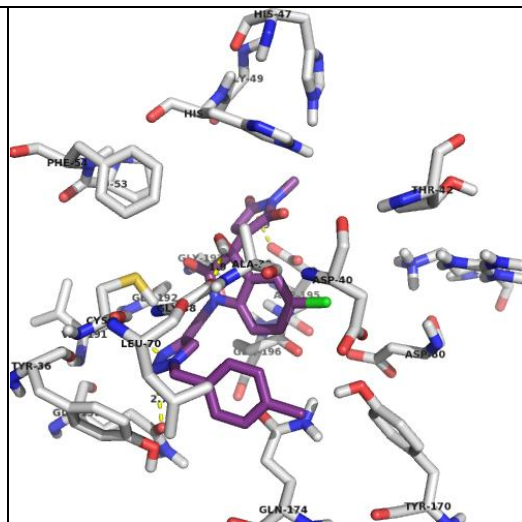

**Docking mode of the compound 4i in the active site of 1JIJ**

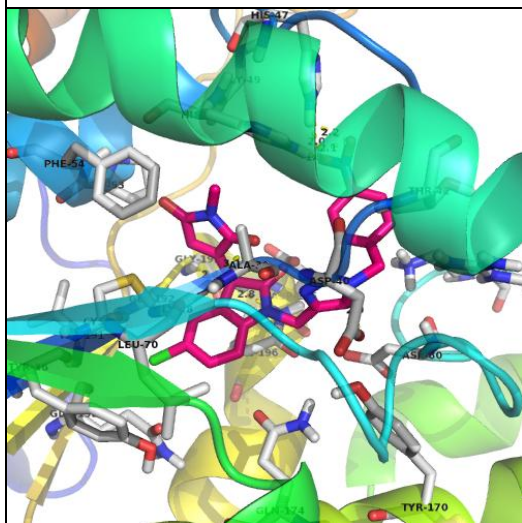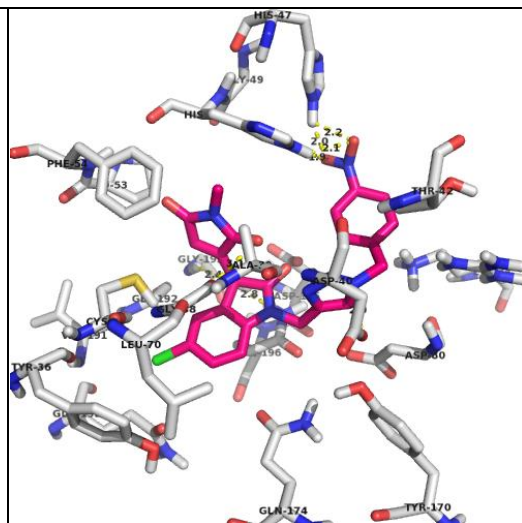

**Docking mode of the compound 4j in the active site of 1JIJ**

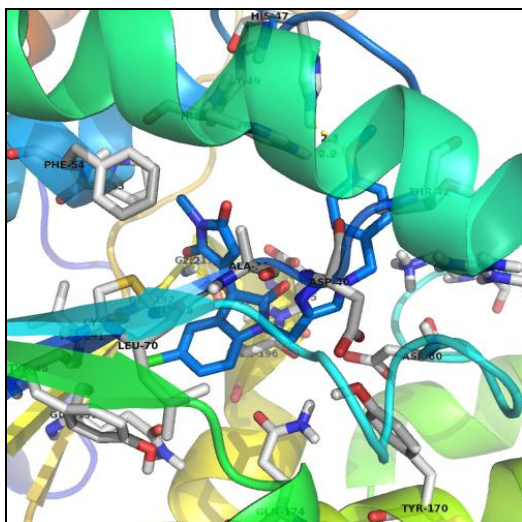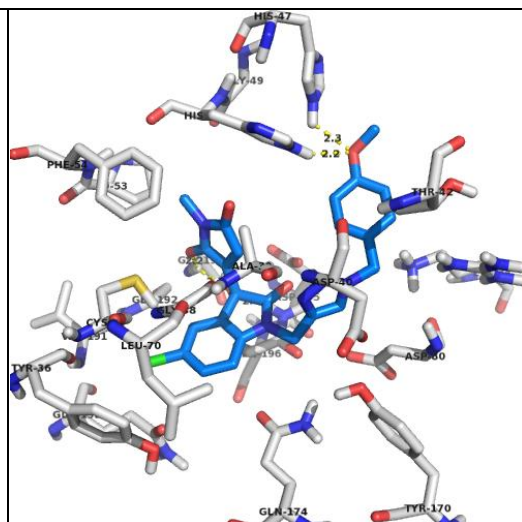

**Docking mode of the compound 4k in the active site of 1JIJ**

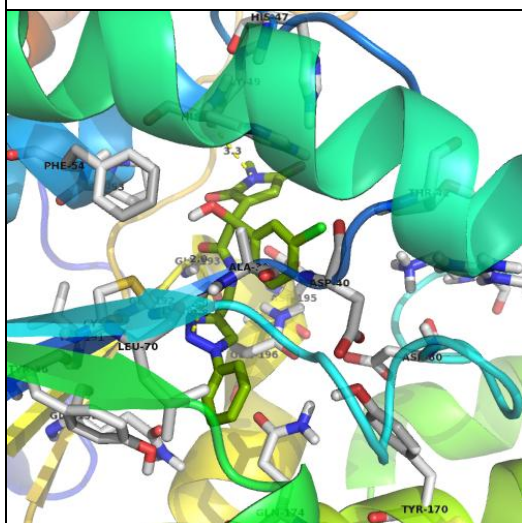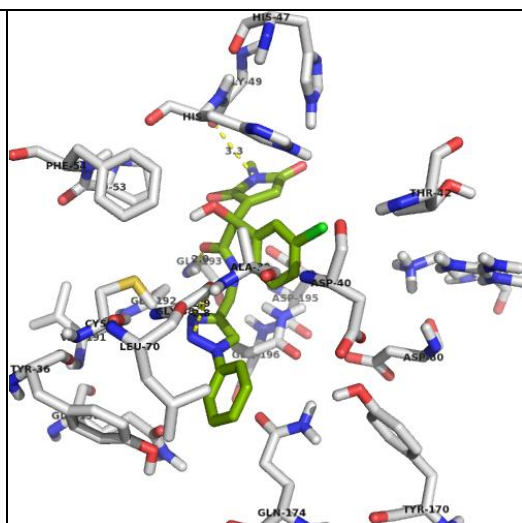

**Docking mode of the compound 4l in the active site of 1JIJ**



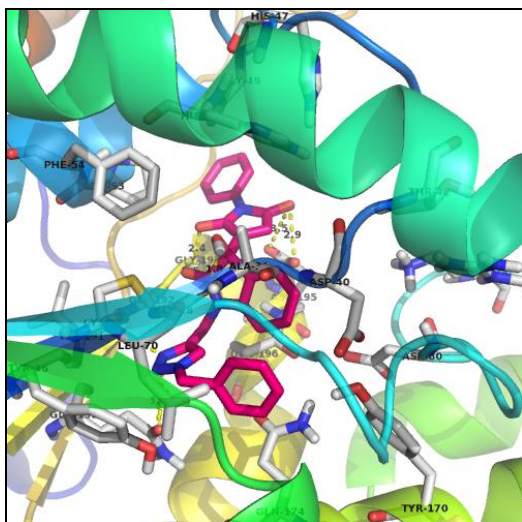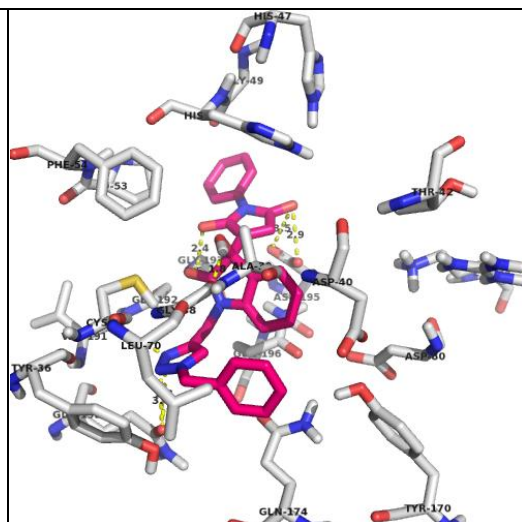

**Docking mode of the compound 4min the active site of 1JIJ**

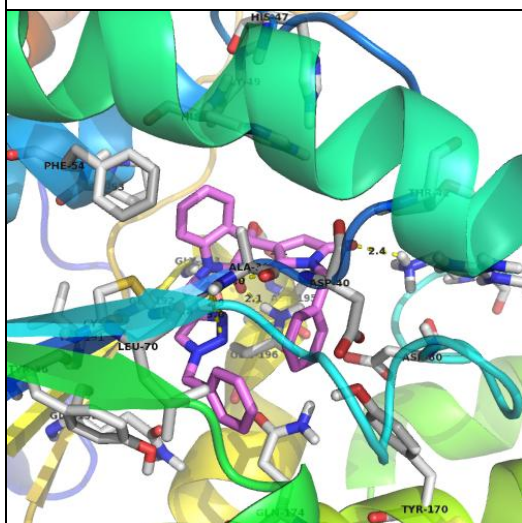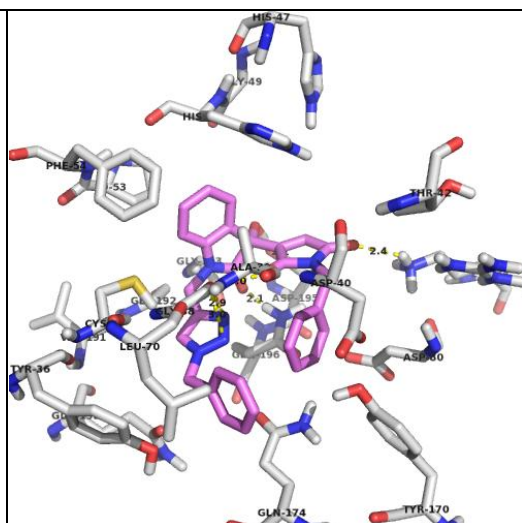

**Docking mode of the compound 4n in the active site of 1JIJ**



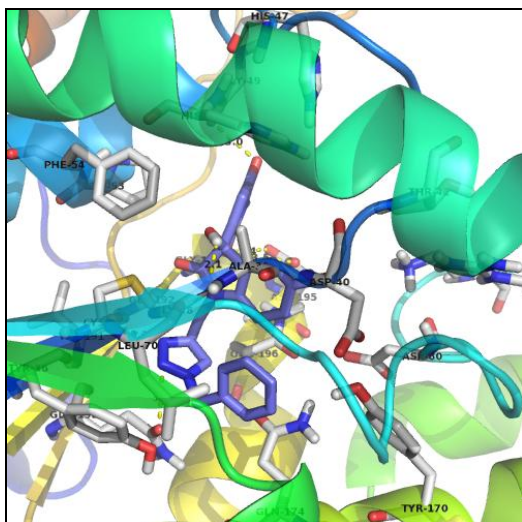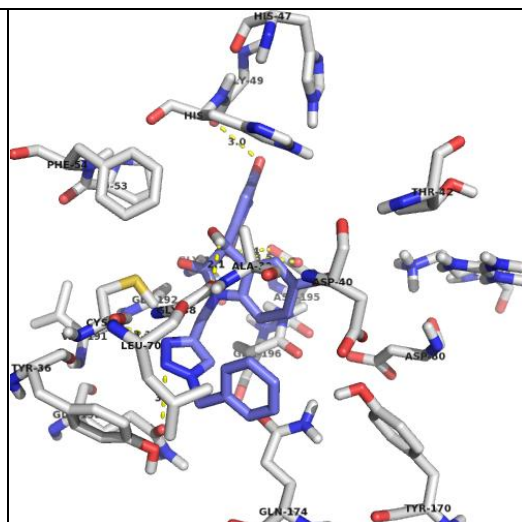

**Docking mode of the compound 4o in the active site of 1JIJ**

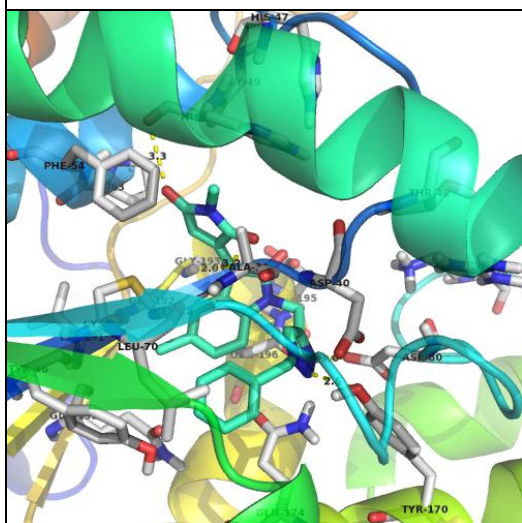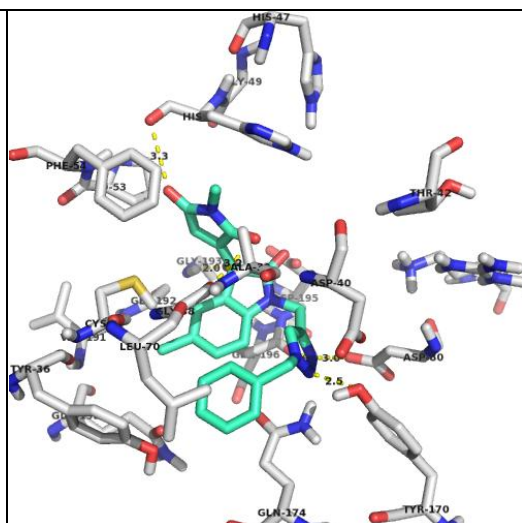

**Docking mode of the compound 4p in the active site of 1JIJ**
